# Supplementary material for: Circular RNA circRGNEF promotes bladder cancer progression via miR-548/KIF2C axis regulation
Source: Aging (Albany NY). 2020 Apr 19;12(8):6865–79. doi: 10.18632/aging.103047 (PMC7202505; doi:10.18632/aging.103047)
Supplement: Supplementary Materials 1 [file aging-12-103047-s002..xlsx]

## Sheet: up_Ca_vs_Con
#log2FC >= 0.585 #p-value cut-off <= 0.05 #q-value cut-off <= 1.00 #Condition pair: up_Ca_vs_Con Column A: circRNA_ID, The ID of circRNA. Column B: Locus, The position of circRNA in reference genome. Column C: Gene_Name, The gene name of circRNA. Column D: Source, The source of circRNA. Column E: Length, The sequence length of circRNA. Column F: Exons_Num, The number of exons in the circRNA. Colu…
CircRNA Annotation								DE Statistic				CPM
circRNA_ID	Locus	Gene_Name	Source	Length	Exons_Num	Genomic_Length	circRNA_Study	log2FC	Fold_Change	p_value	q_value	Ca_CPM	Con_CPM	Ca-1	Ca-2	Con-1	Con-2
hsa_circ_0009154	chr4:39739039-39757359:+	UBE2K	circBase	236	3	18320	Jeck2013, Maass2017, Rybak2015, Salzman2013	6.63324	99.267	0.0124289	0.953548	9.91582	3.28257	541.604	1373.6	0	0
hsa_circ_0085361	chr8:116599227-116632287:-	TRPS1	circBase	2663	3	33060	Rybak2015, Salzman2013	6.49754	90.3552	0.0166985	0.953548	9.78011	3.28257	1733.13	0	0	0
hsa_circ_0007718	chrX:10491131-10535643:-	MID1	circBase	812	2	44512	Jeck2013, Rybak2015	6.41497	85.3295	0.0196198	0.953548	9.69754	3.28257	1408.17	228.934	0	0
hsa_circ_0072995	chr5:73069679-73076570:-	RGNEF	circBase	435	3	6891	Maass2017, Memczak2013, Salzman2013	6.36629	82.4981	0.0224578	0.953548	9.64886	3.28257	216.642	1373.6	0	0
hsa_circ_0002015	chr17:53478829-53481229:-	MMD	circBase	172	2	2400	Jeck2013, Rybak2015	6.32237	80.0243	0.0232642	0.953548	9.60494	3.28257	1191.53	343.401	0	0
hsa_circ_0007813	chr10:12123470-12162266:+	DHTKD1	circBase	2504	15	38796	Jeck2013, Maass2017, Rybak2015	6.0999	68.5886	0.0373683	0.953548	9.38247	3.28257	1083.21	228.934	0	0
chr1:19244855-19246267:-	chr1:19244855-19246267:-	AL080251.1	CIRCexplorer2	237	2	1412	NA	5.99588	63.8176	0.0445019	0.953548	9.27845	3.28257	649.925	572.334	0	0
hsa_circ_0020399	chr10:128768965-129055693:+	DOCK1	circBase	2935	28	286728	Salzman2013	5.71598	52.563	0.00357844	0.874318	11.0167	5.30069	4116.19	0	58.3285	0
hsa_circ_0085173	chr8:102570646-102571040:+	GRHL2	circBase	394	1	394	Salzman2013	5.07286	33.6576	0.00247708	0.751618	11.194	6.12109	4657.79	0	58.3285	61.4649
chr1:108952649-108952761:-	chr1:108952649-108952761:-	SLC25A24P2	CIRCexplorer2	112	1	112	NA	4.79853	27.8293	0.02575	0.953548	10.0983	5.29977	2166.42	0	58.3285	0
hsa_circ_0020397	chr10:128768965-128926028:+	DOCK1	circBase	2738	26	157063	Salzman2013	4.45668	21.9581	0.00183682	0.600216	13.2057	8.74899	18522.9	343.401	349.971	491.719
hsa_circ_0002360	chr21:36206706-36231875:-	RUNX1	circBase	297	2	25169	Jeck2013, Maass2017, Salzman2013	3.87684	14.6908	0.0283788	0.953548	10.0139	6.13706	108.321	1945.94	0	122.93

## Sheet: down_Ca_vs_Con
#log2FC <= -0.585 #p-value cut-off <= 0.05 #q-value cut-off <= 1.00 #Condition pair: down_Ca_vs_Con Column A: circRNA_ID, The ID of circRNA. Column B: Locus, The position of circRNA in reference genome. Column C: Gene_Name, The gene name of circRNA. Column D: Source, The source of circRNA. Column E: Length, The sequence length of circRNA. Column F: Exons_Num, The number of exons in the circRNA. C…
CircRNA Annotation														DE Statistic				CPM
circRNA_ID	Locus	Gene_Name	Source	Length	Exons_Num	Genomic_Length	Flank_Intron	Gene_ID	Trans_ID	RefSeq_ID	Samples	Annotation	circRNA_Study	log2FC	Fold_Change	p_value	q_value	Ca_CPM	Con_CPM	Ca-1	Ca-2	Con-1	Con-2
hsa_circ_0026782	chr12:56094682-56094938:-	ITGA7	circBase	256	1	256	chr12:56094177-56094682|chr12:56094938-56096655	ENSG00000135424.15_3	ENST00000553804.5_1	NM_001144996	Ag04450, right_atrium	ANNOTATED, CDS, coding, INTERNAL, OVCODE, OVEXON	Maass2017, Salzman2013	-10.5177	0.000682111	1.76739e-06	0.00750789	3.28257	13.8003	0	0	27647.7	860.508
hsa_circ_0018064	chr10:29801663-29820217:-	SVIL	circBase	1411	7	18554	chr10:29788192-29801663|chr10:29820217-29839525	ENSG00000197321.14_2	ENST00000375400.7_1	NM_021738	Helas3, Ag04450, A549	ANNOTATED, CDS, coding, INTERNAL, OVCODE, OVEXON	Salzman2013	-9.09669	0.00182651	4.2635e-05	0.0905566	3.28257	12.3793	0	0	10324.1	307.324
hsa_circ_0086414	chr9:16435552-16437522:-	BNC2	circBase	1970	1	1970	chr9:16419647-16435552|chr9:16437522-16552527	ENSG00000173068.17_3	ENST00000380672.8_1	NM_017637	Huvec, H1hesc, Gm12878, Bj, Ag04450, A549, Nhlf, Sknshra, adipose, muscle, MSC_047	ANNOTATED, CDS, coding, INTERNAL, OVCODE, OVERLAPTX, OVEXON	Maass2017, Salzman2013	-8.57927	0.00261447	0.000133975	0.151845	3.28257	11.8618	0	0	7174.41	245.86
hsa_circ_0004119	chr6:57058639-57075243:-	RAB23	circBase	639	5	16604	chr6:57055398-57058639|chr6:57075243-57086523	ENSG00000112210.11_2	ENST00000468148.5_1	NM_016277	Hs68_RNase, Hs68_control, K562, diencephalon, Sy5y_exp1_D4, cerebellum, Sy5y_exp1_D0, occipital_lobe, frontal_cortex, parietal_lobe, temporal_lobe, VSMC, vena_cava, MSC_047	ANNOTATED, CDS, coding, INTERNAL, OVCODE, OVEXON, UTR5	Jeck2013, Maass2017, Rybak2015, Salzman2013	-8.32973	0.00310815	0.000233756	0.198599	3.28257	11.6123	0	0	5132.91	1106.37
hsa_circ_0127664	chr5:113740134-113740553:+	KCNN2	circBase	419	1	419	chr5:113699698-113740134|chr5:113740553-113798745	ENSG00000080709.14_3	ENST00000512097.7_3	ENST00000512097.3	diencephalon, cerebellum, occipital_lobe, frontal_cortex, parietal_lobe, temporal_lobe	ANNOTATED, CDS, coding, INTERNAL, OVCODE, OVEXON	Rybak2015	-7.78137	0.00454543	0.000843424	0.472484	3.28257	11.0639	0	0	4257.98	0
hsa_circ_0000099	chr1:104108056-104118162:+	AMY2B	circBase	1307	8	10106	chr1:104097731-104108056|chr1:104118162-104120111	ENSG00000240038.6_3	ENST00000361355.8_1	NM_020978	cd_19, Nhek, Gm12878, diencephalon, cerebellum, occipital_lobe, frontal_cortex, parietal_lobe, temporal_lobe, adipose, vena_cava	ANNOTATED, CDS, coding, INTERNAL, UTR5	Maass2017, Memczak2013, Rybak2015, Salzman2013	-7.76326	0.00460284	0.000894003	0.472484	3.28257	11.0458	0	0	2916.43	1290.76
hsa_circ_0004846	chr14:55168779-55169298:+	SAMD4A	circBase	519	1	519	chr14:55034830-55168779|chr14:55169298-55203741	ENSG00000020577.13_2	ENST00000554335.5_1	NM_015589	Hs68_RNase, Hs68_control, Nhek, K562, Huvec, Hepg2, Helas3, H1hesc, Bj, Ag04450, A549, diencephalon, cerebellum, occipital_lobe, frontal_cortex, parietal_lobe, temporal_lobe, adipose	ANNOTATED, CDS, coding, INTERNAL, OVCODE, OVEXON	Jeck2013, Maass2017, Rybak2015, Salzman2013	-7.55422	0.00532051	0.00142265	0.54381	3.28257	10.8368	0	0	3266.4	368.789
chr10:29801663-29821101:-	chr10:29801663-29821101:-	SVIL	CIRCexplorer2	1582	8	19438	chr10:29788192-29801663|chr10:29821101-29821457	ENSG00000197321.14_2	ENST00000375398.6_1	NA	NA	NA	NA	-7.52621	0.00542482	0.00153619	0.54381	3.28257	10.8088	0	0	3441.38	122.93
chr6:170667313-170704667:+	chr6:170667313-170704667:+	FAM120B	CIRCexplorer2	502	4	37354	chr6:170657411-170667313|chr6:170704667-170713637	ENSG00000112584.13_3	ENST00000630384.2_1	NA	NA	NA	NA	-7.18197	0.00688671	0.00340233	0.874318	3.28257	10.4645	0	0	2741.44	61.4649
hsa_circ_0002100	chr11:120345268-120348235:+	ARHGEF12	circBase	499	5	2967	chr11:120343836-120345268|chr11:120348235-120348864	ENSG00000196914.8_2	ENST00000356641.7_2	NM_015313	Hs68_RNase, Hs68_control, K562, Helas3, H1hesc, Bj, Ag04450, Nhek, diencephalon, cerebellum, Sy5y_exp1_D0, occipital_lobe, frontal_cortex, Sy5y_exp1_D2, parietal_lobe, temporal_lobe, WAS2, vena_cava, right_atrium, muscle, platelets	ANNOTATED, CDS, coding, INTERNAL, OVCODE, OVEXON	Jeck2013, Maass2017, Rybak2015, Salzman2013	-7.15547	0.00701438	0.00370474	0.874318	3.28257	10.438	0	0	1341.56	1413.69
hsa_circ_0006539	chr8:30332294-30361953:+	RBPMS	circBase	331	4	29659	chr8:30242674-30332294|chr8:30361953-30402010	ENSG00000157110.15_4	ENST00000397323.8_3	NM_006867	Hs68_RNase, Hs68_control, H1hesc, Bj, Ag04450, A549, Nhlf, Sknshra, vena_cava	ANNOTATED, CDS, coding, INTERNAL, OVCODE, OVEXON	Jeck2013, Maass2017, Salzman2013	-7.07398	0.00742201	0.00448875	0.953548	3.28257	10.3565	0	0	1924.84	676.114
hsa_circ_0001640	chr6:131276244-131277639:-	EPB41L2	circBase	719	2	1395	chr6:131247849-131276244|chr6:131277639-131321759	ENSG00000079819.18_3	ENST00000528282.5_2	NM_001199388	cd_19, Helas3, Gm12878, Ag04450, diencephalon, cerebellum, occipital_lobe, frontal_cortex, parietal_lobe, cortex, adipose, vena_cava, right_atrium, muscle	ANNOTATED, CDS, coding, INTERNAL, UTR5	Maass2017, Memczak2013, Rybak2015, Salzman2013	-7.02055	0.007702	0.00498658	0.953548	3.28257	10.3031	0	0	174.986	2335.67
hsa_circ_0004127	chr1:115005725-115007010:-	TRIM33	circBase	397	3	1285	chr1:114976355-115005725|chr1:115007010-115053171	ENSG00000197323.11_3	ENST00000358465.6_1	NM_015906	Hs68_RNase, Hs68_control, Nhek, K562, Hepg2, Helas3, H1hesc, Gm12878, Bj, Ag04450, A549, Sknshra, Mcf7, SY5Y_exp2_D0, diencephalon, Sy5y_exp1_D4, cerebellum, Sy5y_exp1_D0, occipital_lobe, frontal_cortex, Sy5y_exp1_D2, parietal_lobe, temporal_lobe, SY5Y_exp2_D4, placenta, platelets	ANNOTATED, CDS, coding, INTERNAL, OVCODE, OVEXON	Jeck2013, Maass2017, Rybak2015, Salzman2013	-7.00996	0.00775877	0.00501992	0.953548	3.28257	10.2925	0	0	1749.86	737.579
hsa_circ_0017454	chr10:1130342-1132297:+	WDR37	circBase	208	2	1955	chr10:1126416-1130342|chr10:1132297-1139391	ENSG00000047056.14_2	ENST00000358220.5_1	NM_014023	Huvec, Hepg2, H1hesc, Gm12878, Bj, Ag04450, A549	ANNOTATED, CDS, coding, INTERNAL, OVCODE, OVEXON	Salzman2013	-6.85016	0.00866754	0.00694026	0.953548	3.28257	10.1327	0	0	2099.83	122.93
hsa_circ_0006751	chr10:17645558-17646046:-	PTPLA	circBase	226	3	488	chr10:17641410-17645558|chr10:17646046-17659081	ENSG00000165996.13_3	ENST00000361271.7_1	NM_014241	Hs68_RNase, Hs68_control, diencephalon, cerebellum, occipital_lobe, frontal_cortex, parietal_lobe, temporal_lobe, vena_cava, platelets	ANNOTATED, CDS, coding, INTERNAL, OVCODE, OVEXON	Jeck2013, Maass2017, Rybak2015	-6.73303	0.00940063	0.00949543	0.953548	3.28257	10.0156	0	0	1924.84	122.93
hsa_circ_0007646	chr4:52729602-52758017:+	DCUN1D4	circBase	1047	5	28415	chr4:52709433-52729602|chr4:52758017-52765435	ENSG00000109184.14_2	ENST00000509376.5_1	NM_001040402	Hs68_RNase, Hs68_control, K562, Hepg2, Helas3, H1hesc, Gm12878, Bj, Ag04450, A549, Nhek, Sknshra, diencephalon, cerebellum, Sy5y_exp1_D0, occipital_lobe, frontal_cortex, Sy5y_exp1_D2, parietal_lobe, SY5Y_exp2_D8, temporal_lobe, SY5Y_exp2_D4, WAS2, ada_scid, adipose, vena_cava, right_atrium, muscle, fibroblasts, platelets	ANNOTATED, CDS, coding, INTERNAL, OVCODE, OVEXON	Jeck2013, Maass2017, Rybak2015, Salzman2013	-6.72703	0.00943977	0.00952482	0.953548	3.28257	10.0096	0	0	874.928	1167.83
hsa_circ_0105101	chr16:1859238-1859834:-	HAGH	circBase	225	2	596	chr16:1845721-1859238|chr16:1859834-1866893	ENSG00000063854.12_2	ENST00000564445.5_1	ENST00000566709.1	diencephalon, cerebellum, Sy5y_exp1_D0, occipital_lobe, frontal_cortex, Sy5y_exp1_D2, parietal_lobe, temporal_lobe, SY5Y_exp2_D4	ALT_DONOR, CDS, coding, INTERNAL, OVCODE, OVEXON, UTR3	Rybak2015	-6.61438	0.0102064	0.0120821	0.953548	3.28257	9.89696	0	0	1516.54	368.789
hsa_circ_0006667	chr3:183368083-183390272:+	KLHL24	circBase	1663	5	22189	chr3:183361330-183368083|chr3:183390272-183396873	ENSG00000114796.15_2	ENST00000242810.10_1	NM_017644	Hs68_RNase, Hs68_control, K562, H1hesc, Gm12878, Ag04450, A549, Sknshra, diencephalon, Sy5y_exp1_D4, cerebellum, occipital_lobe, frontal_cortex, parietal_lobe, temporal_lobe, cortex	ANNOTATED, CDS, coding, INTERNAL, OVCODE, OVEXON, UTR5	Jeck2013, Maass2017, Rybak2015, Salzman2013	-6.60553	0.0102692	0.0121407	0.953548	3.28257	9.8881	0	0	1749.86	122.93
chr10:97110965-97144042:-	chr10:97110965-97144042:-	SORBS1	CIRCexplorer2	1022	10	33077	chr10:97106209-97110965|chr10:97144042-97156976	ENSG00000095637.21_3	ENST00000371227.8_1	NA	NA	NA	NA	-6.56496	0.0105621	0.0124193	0.953548	3.28257	9.84753	0	0	1574.87	245.86
hsa_circ_0075329	chr5:179315102-179315312:-	TBC1D9B	circBase	210	1	210	chr5:179306789-179315102|chr5:179315312-179318378	ENSG00000197226.12_1	ENST00000355235.7_1	NM_198868	Bj, Ag04450, Nhek, Sknshra, platelets	ANNOTATED, CDS, coding, INTERNAL, OVCODE, OVEXON	Maass2017, Salzman2013	-6.55581	0.0106293	0.0125121	0.953548	3.28257	9.83838	0	0	1808.18	0
chr9:79318252-79328637:-	chr9:79318252-79328637:-	PRUNE2	CIRCexplorer2	7520	3	10385	chr9:79270418-79318252|chr9:79328637-79438547	ENSG00000106772.17_3	ENST00000376718.7_1	NA	NA	NA	NA	-6.55581	0.0106293	0.0125121	0.953548	3.28257	9.83838	0	0	1808.18	0
hsa_circ_0105076	chr16:15808765-15809129:-	MYH11	circBase	282	2	364	chr16:15797980-15808765|chr16:15809129-15810996	ENSG00000133392.17_3	ENST00000396324.7_2	NM_001040113	cerebellum	ANNOTATED, CDS, coding, INTERNAL, OVCODE, OVERLAPTX, OVEXON	Rybak2015	-6.52085	0.01089	0.014086	0.953548	3.28257	9.80342	0	0	1458.21	307.324
hsa_circ_0002387	chr3:170906490-170912424:-	TNIK	circBase	333	3	5934	chr3:170895169-170906490|chr3:170912424-170928904	ENSG00000154310.16_3	ENST00000436636.6_1	NM_015028	Hs68_RNase, Hs68_control, K562, Huvec, H1hesc, Gm12878, Bj, Ag04450, Sknshra, SY5Y_exp2_D0, diencephalon, cerebellum, Sy5y_exp1_D0, occipital_lobe, frontal_cortex, Sy5y_exp1_D2, parietal_lobe, temporal_lobe, WAS2, ada_scid, cortex, vena_cava, right_atrium, LCL, platelets	ANNOTATED, CDS, coding, INTERNAL, OVCODE, OVEXON	Jeck2013, Maass2017, Rybak2015, Salzman2013	-6.51598	0.0109269	0.014134	0.953548	3.28257	9.79855	0	0	349.971	1413.69
hsa_circ_0073222	chr5:80911291-80946158:-	SSBP2	circBase	220	3	34867	chr5:80809536-80911291|chr5:80946158-81046799	ENSG00000145687.16_3	ENST00000320672.8_1	NM_012446	K562, Ag04450, Nhek, Sknshra, diencephalon, cerebellum, Sy5y_exp1_D0, occipital_lobe, frontal_cortex, Sy5y_exp1_D2, parietal_lobe, SY5Y_exp2_D8, temporal_lobe, SY5Y_exp2_D4, adipose, vena_cava, platelets	ANNOTATED, CDS, coding, INTERNAL, OVCODE, OVEXON	Maass2017, Rybak2015, Salzman2013	-6.4898	0.0111269	0.0158458	0.953548	3.28257	9.77237	0	0	991.585	737.579
hsa_circ_0077736	chr6:118832460-118887479:-	CEP85L	circBase	1025	3	55019	chr6:118813028-118832460|chr6:118887479-118953615	ENSG00000111860.13_4	ENST00000368491.7_3	NM_001042475	K562, Helas3, Ag04450, A549, Sknshra, diencephalon, cerebellum, occipital_lobe, frontal_cortex, parietal_lobe, temporal_lobe, platelets	ANNOTATED, CDS, coding, INTERNAL, OVCODE, OVERLAPTX, OVEXON	Maass2017, Rybak2015, Salzman2013	-6.48259	0.0111827	0.0159355	0.953548	3.28257	9.76516	0	0	1166.57	553.184
hsa_circ_0054211	chr2:39559057-39564722:-	MAP4K3	circBase	220	4	5665	chr2:39553418-39559057|chr2:39564722-39570528	ENSG00000011566.14_3	ENST00000263881.7_2	NM_003618	K562, Hepg2, Helas3, H1hesc, Gm12878, Bj, Ag04450, A549, Sknshra, SY5Y_exp2_D0, diencephalon, cerebellum, occipital_lobe, frontal_cortex, Sy5y_exp1_D2, parietal_lobe, platelets	ANNOTATED, CDS, coding, INTERNAL, OVCODE, OVEXON	Maass2017, Rybak2015, Salzman2013	-6.47291	0.0112579	0.0160569	0.953548	3.28257	9.75549	0	0	1399.88	307.324
hsa_circ_0049487	chr19:11657489-11657784:+	CNN1	circBase	205	2	295	chr19:11652012-11657489|chr19:11657784-11658611	ENSG00000130176.7_2	ENST00000252456.6_1	NM_001299	K562, Bj, Ag04450	ANNOTATED, CDS, coding, INTERNAL, OVCODE, OVEXON	Salzman2013	-6.46562	0.011315	0.0161492	0.953548	3.28257	9.74819	0	0	1574.87	122.93
hsa_circ_0005204	chr11:57258696-57259335:-	SLC43A1	circBase	322	3	639	chr11:57256865-57258696|chr11:57259335-57261465	ENSG00000149150.8_3	ENST00000278426.7_2	NM_003627	Hs68_RNase, Hs68_control, K562, Huvec, Hepg2, Helas3, H1hesc, Gm12878, Bj, Ag04450, A549, Nhek, Sknshra, diencephalon, cerebellum, occipital_lobe, frontal_cortex, parietal_lobe, temporal_lobe, adipose, vena_cava, platelets	ANNOTATED, CDS, coding, INTERNAL, OVCODE, OVEXON	Jeck2013, Maass2017, Rybak2015, Salzman2013	-6.42333	0.0116516	0.0183646	0.953548	3.28257	9.7059	0	0	1341.56	307.324
hsa_circ_0005644	chr2:190593385-190609514:+	ANKAR	circBase	596	5	16129	chr2:190593146-190593385|chr2:190609514-190611105	ENSG00000151687.14_3	ENST00000433782.6_1	NM_144708	Hs68_RNase, Hs68_control, diencephalon, cerebellum, occipital_lobe, frontal_cortex, Sy5y_exp1_D2, parietal_lobe, temporal_lobe, adipose, muscle, platelets	ANNOTATED, CDS, coding, INTERNAL, OVCODE, OVEXON	Jeck2013, Maass2017, Rybak2015	-6.40026	0.0118394	0.0186857	0.953548	3.28257	9.68283	0	0	641.614	983.438
hsa_circ_0000660	chr15:94899365-94945248:+	MCTP2	circBase	1080	9	45883	chr15:94888393-94899365|chr15:94945248-94983404	ENSG00000140563.14_3	ENST00000456504.5_1	NM_001159643	cd_19, H1hesc, Gm12878, Ag04450, cerebellum, WAS2, LCL	ANNOTATED, CDS, coding, INTERNAL	Maass2017, Memczak2013, Rybak2015, Salzman2013	-6.37418	0.0120554	0.019059	0.953548	3.28257	9.65675	0	0	0	1598.09
hsa_circ_0071099	chr4:148743877-148744108:+	ARHGAP10	circBase	158	2	231	chr4:148653606-148743877|chr4:148744108-148768301	ENSG00000071205.11_2	ENST00000510379.1_1	NM_024605	Huvec, Gm12878, Bj, Ag04450, Nhek, Sknshra, diencephalon, right_atrium, platelets	ANNOTATED, CDS, coding, INTERNAL, OVCODE, OVEXON	Maass2017, Rybak2015, Salzman2013	-6.31065	0.0125981	0.0220725	0.953548	3.28257	9.59322	0	0	1399.88	122.93
hsa_circ_0008861	chr5:76745584-76760634:-	WDR41	circBase	530	6	15050	chr5:76736822-76745584|chr5:76760634-76785281	ENSG00000164253.13_4	ENST00000296679.8_1	NM_018268	Hs68_RNase, Hs68_control, K562, Hepg2, Helas3, H1hesc, Gm12878, Bj, Ag04450, A549, Nhek, Sknshra, diencephalon, cerebellum, Sy5y_exp1_D0, occipital_lobe, frontal_cortex, parietal_lobe, temporal_lobe	ANNOTATED, CDS, coding, INTERNAL, OVCODE, OVEXON	Jeck2013, Rybak2015, Salzman2013	-6.27732	0.0128925	0.0250244	0.953548	3.28257	9.55989	0	0	874.928	614.649
chr2:230638812-230653656:-	chr2:230638812-230653656:-	TRIP12	CIRCexplorer2	999	7	14844	chr2:230636348-230638812|chr2:230653656-230654326	ENSG00000153827.13_3	ENST00000283943.9_1	NA	NA	NA	NA	-6.19431	0.0136561	0.0295032	0.953548	3.28257	9.47688	0	0	1341.56	61.4649
chr10:29801663-29813644:-	chr10:29801663-29813644:-	SVIL	CIRCexplorer2	1174	4	11981	chr10:29788192-29801663|chr10:29813644-29818633	ENSG00000197321.14_2	ENST00000375400.7_1	NA	NA	NA	NA	-6.19139	0.0136838	0.0295659	0.953548	3.28257	9.47396	0	0	1399.88	0
hsa_circ_0000348	chr11:92085261-92088570:+	FAT3	circBase	3309	1	3309	None|chr11:92088570-92257799	ENSG00000165323.15_2	ENST00000409404.6_1	NM_001008781	HEK293, diencephalon, cerebellum, Sy5y_exp1_D0, occipital_lobe, frontal_cortex, Sy5y_exp1_D2, parietal_lobe, temporal_lobe, cortex, umbilical_cord	ANNOTATED, CDS, coding, UTR5	Maass2017, Memczak2013, Rybak2015	-6.16583	0.0139284	0.000142981	0.151845	7.48457	13.6504	0	343.401	25139.6	553.184
hsa_circ_0102766	chr14:88883054-88904247:+	SPATA7	circBase	1043	8	21193	chr14:88862547-88883054|chr14:88904247-88904670	ENSG00000042317.16_3	ENST00000045347.11_1	ENST00000045347.7	diencephalon, cerebellum, occipital_lobe, frontal_cortex, parietal_lobe, temporal_lobe	ANNOTATED, CDS, coding, INTERNAL, OVCODE, OVEXON	Rybak2015	-6.15207	0.0140619	0.0304111	0.953548	3.28257	9.43464	0	0	933.256	430.254
hsa_circ_0001329	chr3:119219541-119222868:+	TIMMDC1	circBase	323	3	3327	chr3:119217774-119219541|chr3:119222868-119232487	ENSG00000113845.9_2	ENST00000494664.5_1	NM_016589	cd_19, neutr, Hs68_RNase, Hs68_control, Nhek, K562, Huvec, Hepg2, Helas3, H1hesc, Gm12878, Bj, Ag04450, A549, Sknshra, SY5Y_exp2_D0, diencephalon, Sy5y_exp1_D4, cerebellum, occipital_lobe, frontal_cortex, parietal_lobe, temporal_lobe, SY5Y_exp2_D4, adipose, VSMC, vena_cava, HUAEC, platelets	ANNOTATED, CDS, coding, INTERNAL, OVCODE, OVEXON	Jeck2013, Maass2017, Memczak2013, Rybak2015, Salzman2013	-6.15207	0.0140619	0.0304111	0.953548	3.28257	9.43464	0	0	933.256	430.254
hsa_circ_0093655	chr10:43650344-43671480:+	CSGALNACT2	circBase	1589	6	21136	chr10:43634015-43650344|chr10:43671480-43678697	ENSG00000169826.7_2	ENST00000374466.3_1	ENST00000374466.3	diencephalon, Sy5y_exp1_D4, cerebellum, occipital_lobe, frontal_cortex, Sy5y_exp1_D2, parietal_lobe, temporal_lobe	ANNOTATED, CDS, coding, INTERNAL, OVCODE, OVEXON, UTR5	Rybak2015	-6.14605	0.0141206	0.0305455	0.953548	3.28257	9.42862	0	0	1049.91	307.324
hsa_circ_0002570	chr1:78267015-78280916:+	FAM73A	circBase	700	5	13901	chr1:78249036-78267015|chr1:78280916-78308991	ENSG00000180488.14_3	ENST00000370791.7_1	NM_198549	Hs68_RNase, Hs68_control, K562, Hepg2, Gm12878, Ag04450, Sknshra, diencephalon, cerebellum, Sy5y_exp1_D0, occipital_lobe, frontal_cortex, Sy5y_exp1_D2, parietal_lobe, temporal_lobe, vena_cava, platelets	ANNOTATED, CDS, coding, INTERNAL, OVCODE, OVEXON	Jeck2013, Maass2017, Rybak2015, Salzman2013	-6.13394	0.0142396	0.0308182	0.953548	3.28257	9.41652	0	0	1283.23	61.4649
chr16:15808765-15808938:-	chr16:15808765-15808938:-	MYH11	CIRCexplorer2	173	1	173	chr16:15797980-15808765|chr16:15808938-15809020	ENSG00000133392.17_3	ENST00000396324.7_2	NA	NA	NA	NA	-6.1309	0.0142697	0.0308872	0.953548	3.28257	9.41347	0	0	1341.56	0
chr5:228299-233760:+	chr5:228299-233760:+	SDHA	CIRCexplorer2	443	3	5461	chr5:226162-228299|chr5:233760-235258	ENSG00000073578.16_3	ENST00000264932.10_1	NA	NA	NA	NA	-6.1309	0.0142697	0.0308872	0.953548	3.28257	9.41347	0	0	1341.56	0
hsa_circ_0069718	chr4:52729602-52765544:+	DCUN1D4	circBase	1156	6	35942	chr4:52709433-52729602|chr4:52765544-52779455	ENSG00000109184.14_2	ENST00000509376.5_1	NM_001040402	K562, Huvec, Helas3, H1hesc, Gm12878, Bj, Ag04450, A549, Sknshra, diencephalon, Sy5y_exp1_D4, cerebellum, Sy5y_exp1_D0, occipital_lobe, frontal_cortex, Sy5y_exp1_D2, parietal_lobe, temporal_lobe, adipose, vena_cava, platelets	ANNOTATED, CDS, coding, INTERNAL, OVCODE, OVERLAPTX, OVEXON	Maass2017, Rybak2015, Salzman2013	-6.10541	0.0145241	0.0349578	0.953548	3.28257	9.38798	0	0	583.285	737.579
hsa_circ_0005982	chr8:141828375-141900868:-	PTK2	circBase	899	8	72493	chr8:141813749-141828375|chr8:141900868-141935759	ENSG00000169398.19_3	ENST00000522684.5_2	NM_001199649	Hs68_RNase, Hs68_control, Nhek, K562, Hepg2, Helas3, H1hesc, Bj, Ag04450, A549, Sknshra, Mcf7, SY5Y_exp2_D0, diencephalon, Sy5y_exp1_D4, cerebellum, Sy5y_exp1_D0, occipital_lobe, frontal_cortex, Sy5y_exp1_D2, parietal_lobe, temporal_lobe, SY5Y_exp2_D4, EPC, adipose, decidua, vena_cava, right_atrium	ANNOTATED, CDS, coding, INTERNAL, OVCODE, OVEXON, UTR5	Jeck2013, Maass2017, Rybak2015, Salzman2013	-6.10231	0.0145553	0.0350346	0.953548	3.28257	9.38488	0	0	641.614	676.114
hsa_circ_0042103	chr17:12608444-12626325:+	MYOCD	circBase	360	4	17881	chr17:12569560-12608444|chr17:12626325-12639477	ENSG00000141052.17_2	ENST00000425538.5_1	NM_001146312	Ag04450, A549, vena_cava, right_atrium	ANNOTATED, CDS, coding, INTERNAL, OVCODE, OVERLAPTX, OVEXON	Maass2017, Salzman2013	-6.01824	0.0154287	0.0414389	0.953548	3.28257	9.30081	0	0	933.256	307.324
chr6:160453582-160464320:+	chr6:160453582-160464320:+	IGF2R	CIRCexplorer2	739	5	10738	chr6:160450687-160453582|chr6:160464320-160465545	ENSG00000197081.12_3	ENST00000356956.5_2	NA	NA	NA	NA	-6.01495	0.0154639	0.0415321	0.953548	3.28257	9.29753	0	0	991.585	245.86
hsa_circ_0001472	chr5:36953719-36976504:+	NIPBL	circBase	1574	8	22785	chr5:36877280-36953719|chr5:36976504-36984777	ENSG00000164190.17_3	ENST00000282516.12_2	NM_015384	cd_19, K562, Helas3, H1hesc, Gm12878, Ag04450, Nhek, Sknshra, SY5Y_exp2_D0, diencephalon, Sy5y_exp1_D4, cerebellum, Sy5y_exp1_D0, occipital_lobe, frontal_cortex, Sy5y_exp1_D2, parietal_lobe, temporal_lobe, adipose, vena_cava	ANNOTATED, CDS, coding, INTERNAL, UTR5	Maass2017, Memczak2013, Rybak2015, Salzman2013	-5.9635	0.0160254	0.0428604	0.953548	3.28257	9.24607	0	0	641.614	553.184
hsa_circ_0008243	chr4:148785996-148803083:+	ARHGAP10	circBase	548	5	17087	chr4:148778805-148785996|chr4:148803083-148827788	ENSG00000071205.11_2	ENST00000336498.7_1	NM_024605	Hs68_RNase, Hs68_control, diencephalon, cerebellum, vena_cava	ANNOTATED, CDS, coding, INTERNAL, OVCODE, OVEXON	Jeck2013, Maass2017, Rybak2015	-5.96009	0.0160633	0.0429513	0.953548	3.28257	9.24266	0	0	699.942	491.719
hsa_circ_0032064	chr14:58690339-58690574:+	ACTR10	circBase	154	2	235	chr14:58686447-58690339|chr14:58690574-58697116	ENSG00000131966.13_3	ENST00000545307.6_1	NM_018477	Nhek, K562, Hepg2, Bj, Sknshra, diencephalon, cerebellum, Sy5y_exp1_D0, occipital_lobe, frontal_cortex, parietal_lobe, temporal_lobe, adipose, platelets	ANNOTATED, CDS, coding, INTERNAL, OVCODE, OVEXON	Maass2017, Rybak2015, Salzman2013	-5.95325	0.0161396	0.0431347	0.953548	3.28257	9.23582	0	0	816.599	368.789
hsa_circ_0067175	chr3:127393233-127393443:+	ABTB1	circBase	84	2	210	chr3:127391924-127393233|chr3:127393443-127394812	ENSG00000114626.17_3	ENST00000483857.5_1	NM_172027	Huvec, Bj, Ag04450, Nhlf	ANNOTATED, CDS, coding, INTERNAL, OVCODE, OVEXON	Salzman2013	-5.95325	0.0161396	0.0431347	0.953548	3.28257	9.23582	0	0	816.599	368.789
hsa_circ_0086735	chr9:33986757-34017187:-	UBAP2	circBase	561	5	30430	chr9:33973235-33986757|chr9:34017187-34048822	ENSG00000137073.21_3	ENST00000379238.5_1	NM_018449	K562, Huvec, Hepg2, Ag04450, A549, Sknshra, diencephalon, cerebellum, occipital_lobe, frontal_cortex, Sy5y_exp1_D2, parietal_lobe, temporal_lobe, SY5Y_exp2_D4, EPC, WAS2, ada_scid, adipose, HUAEC, platelets	ANNOTATED, CDS, coding, INTERNAL, OVCODE, OVEXON, UTR5	Maass2017, Rybak2015, Salzman2013	-5.95325	0.0161396	0.0431347	0.953548	3.28257	9.23582	0	0	816.599	368.789
hsa_circ_0054226	chr2:40366540-40404995:-	SLC8A1	circBase	629	5	38455	chr2:40342769-40366540|chr2:40404995-40655612	ENSG00000183023.18_3	ENST00000406785.6_1	NM_001252624	Ag04450, frontal_cortex	ANNOTATED, CDS, coding, INTERNAL, OVCODE, OVERLAPTX, OVEXON	Rybak2015, Salzman2013	-5.94982	0.0161781	0.0432272	0.953548	3.28257	9.23239	0	0	874.928	307.324
hsa_circ_0003428	chr18:51804072-51813781:+	POLI	circBase	792	5	9709	chr18:51800460-51804072|chr18:51813781-51818202	ENSG00000101751.10_3	ENST00000579534.5_1	NM_007195	Hs68_RNase, Hs68_control, K562, Ag04450, Sknshra, diencephalon, Sy5y_exp1_D4, cerebellum, Sy5y_exp1_D0, occipital_lobe, frontal_cortex, Sy5y_exp1_D2, parietal_lobe, temporal_lobe, adipose, vena_cava, right_atrium, MSC_047, platelets	ANNOTATED, CDS, coding, INTERNAL, OVCODE, OVEXON	Jeck2013, Maass2017, Rybak2015, Salzman2013	-5.93948	0.0162944	0.0435076	0.953548	3.28257	9.22205	0	0	1049.91	122.93
hsa_circ_0075161	chr5:176636636-176639196:+	NSD1	circBase	2560	1	2560	chr5:176631293-176636636|chr5:176639196-176662821	ENSG00000165671.19_3	ENST00000354179.8_2	NM_022455	K562, Huvec, H1hesc, Gm12878, Bj, Ag04450, A549, Nhek, Sknshra, diencephalon, Sy5y_exp1_D4, cerebellum, Sy5y_exp1_D0, occipital_lobe, frontal_cortex, parietal_lobe, SY5Y_exp2_D8, temporal_lobe	ANNOTATED, CDS, coding, INTERNAL, OVCODE, OVEXON	Rybak2015, Salzman2013	-5.93255	0.0163729	0.0436972	0.953548	3.28257	9.21512	0	0	1166.57	0
hsa_circ_0005835	chr16:19627435-19628130:+	C16orf62	circBase	201	2	695	chr16:19621737-19627435|chr16:19628130-19637498	ENSG00000103544.14_3	ENST00000438132.7_1	NM_020314	Hs68_RNase, Hs68_control, K562, H1hesc, Gm12878, Bj, Ag04450, A549, Sknshra, Mcf7, diencephalon, cerebellum, occipital_lobe, frontal_cortex, parietal_lobe, temporal_lobe, WAS2, vena_cava	ANNOTATED, CDS, coding, INTERNAL, OVCODE, OVEXON	Jeck2013, Maass2017, Rybak2015, Salzman2013	-5.89589	0.0167942	0.0499544	0.953548	3.28257	9.17846	0	0	524.957	614.649
hsa_circ_0001449	chr4:148860975-148876525:+	ARHGAP10	circBase	222	3	15550	chr4:148834290-148860975|chr4:148876525-148886174	ENSG00000071205.11_2	ENST00000336498.7_1	NM_024605	cd_34, Huvec, Helas3, H1hesc, Gm12878, Bj, Ag04450, A549, Nhek, Sknshra, diencephalon, cerebellum, WAS2, vena_cava, platelets	ANNOTATED, CDS, coding, INTERNAL	Maass2017, Memczak2013, Rybak2015, Salzman2013	-5.19039	0.0273865	0.00134304	0.54381	6.93501	12.1254	0	228.934	7991	921.973
hsa_circ_0109301	chr19:22157530-22171711:-	ZNF208	circBase	302	3	14181	chr19:22116039-22157530|chr19:22171711-22193593	ENSG00000160321.14_3	ENST00000599916.5_1	ENST00000599916.1	temporal_lobe	ANNOTATED, CDS, coding, INTERNAL, OVCODE, OVEXON	Rybak2015	-5.0523	0.0301375	0.000996376	0.472484	7.47199	12.5243	108.321	228.934	11082.4	676.114
hsa_circ_0001546	chr5:153413350-153414527:-	FAM114A2	circBase	417	3	1177	chr5:153409140-153413350|chr5:153414527-153418416	ENSG00000055147.18_3	ENST00000351797.8_2	NM_018691	cd_19, neutr, Hs68_RNase, Hs68_control, K562, Huvec, Hepg2, Helas3, Gm12878, Bj, Ag04450, A549, Nhek, Sknshra, SY5Y_exp2_D0, diencephalon, cerebellum, occipital_lobe, frontal_cortex, Sy5y_exp1_D2, parietal_lobe, temporal_lobe, SY5Y_exp2_D4, WAS2, adipose, vena_cava, umbilical_cord, platelets	ANNOTATED, CDS, coding, INTERNAL, OVCODE, OVEXON, UTR5	Jeck2013, Maass2017, Memczak2013, Rybak2015, Salzman2013	-4.83184	0.0351132	0.0100789	0.953548	6.04117	10.873	0	114.467	1458.21	2274.2
hsa_circ_0108457	chr18:42529845-42533305:+	SETBP1	circBase	3460	1	3460	chr18:42449248-42529845|chr18:42533305-42618449	ENSG00000152217.16_3	ENST00000282030.5_1	ENST00000282030.5	SY5Y_exp2_D0, diencephalon, cerebellum, occipital_lobe, frontal_cortex, Sy5y_exp1_D2, parietal_lobe, temporal_lobe	ANNOTATED, CDS, coding, INTERNAL, OVCODE, OVEXON	Rybak2015	-4.80433	0.0357892	0.0031673	0.874318	6.9044	11.7087	216.642	0	5074.58	1598.09
hsa_circ_0000994	chr2:40655612-40657444:-	SLC8A1	circBase	1832	1	1832	chr2:40404995-40655612|chr2:40657444-40679043	ENSG00000183023.18_3	ENST00000406785.6_1	NM_021097	cd_19, cd_34, Nhek, Hsmm, Hmec, Gm12878, Bj, Ag04450, A549, Sknshra, SY5Y_exp2_D0, diencephalon, Sy5y_exp1_D4, cerebellum, Sy5y_exp1_D0, occipital_lobe, frontal_cortex, Sy5y_exp1_D2, parietal_lobe, SY5Y_exp2_D8, temporal_lobe, SY5Y_exp2_D4, chondrocytes, cortex, osteocytes, decidua, vena_cava, right_atrium, umbilical_cord, MSC_047, placenta, fibroblasts, MSC	ANNOTATED, CDS, coding, UTR5	Maass2017, Memczak2013, Rybak2015, Salzman2013	-4.68359	0.0389134	0.00100103	0.472484	9.53116	14.2148	433.283	1030.2	32780.6	5224.51
hsa_circ_0001633	chr6:107824860-107827631:+	SOBP	circBase	325	2	2771	chr6:107811916-107824860|chr6:107827631-107854662	ENSG00000112320.11_2	ENST00000317357.9_1	NM_018013	HEK293, Huvec, Hepg2, Helas3, H1hesc, Bj, Ag04450, A549, Sknshra, SY5Y_exp2_D0, diencephalon, cerebellum, occipital_lobe, frontal_cortex, parietal_lobe, temporal_lobe, cortex, umbilical_cord	ANNOTATED, CDS, coding, INTERNAL	Maass2017, Memczak2013, Rybak2015, Salzman2013	-4.60245	0.0411646	0.0164262	0.953548	6.0414	10.6439	0	114.467	2624.78	553.184
hsa_circ_0003426	chr20:32207322-32211102:+	CBFA2T2	circBase	272	2	3780	chr20:32199141-32207322|chr20:32211102-32212569	ENSG00000078699.21_2	ENST00000342704.10_2	NM_005093	Hs68_RNase, Hs68_control, Nhek, K562, Huvec, Hsmm, Hepg2, Helas3, H1hesc, Gm12878, Bj, Ag04450, A549, Sknshra, Mcf7, diencephalon, Sy5y_exp1_D4, cerebellum, Sy5y_exp1_D0, occipital_lobe, frontal_cortex, Sy5y_exp1_D2, parietal_lobe, temporal_lobe, SY5Y_exp2_D4, WAS2, right_atrium, platelets	ANNOTATED, CDS, coding, INTERNAL, OVCODE, OVEXON	Jeck2013, Maass2017, Rybak2015, Salzman2013	-4.47755	0.0448874	0.0208721	0.953548	6.04155	10.5191	0	114.467	1808.18	1106.37
hsa_circ_0005332	chr3:114069120-114070725:-	ZBTB20	circBase	1605	1	1605	chr3:114058273-114069120|chr3:114070725-114099063	ENSG00000181722.16_3	ENST00000357258.8_2	NM_001164343	Hs68_RNase, Hs68_control, Nhek, Huvec, Hsmm, Hepg2, Helas3, H1hesc, Gm12878, Bj, Ag04450, A549, Nhlf, Sknshra, diencephalon, Sy5y_exp1_D4, cerebellum, Sy5y_exp1_D0, occipital_lobe, frontal_cortex, Sy5y_exp1_D2, parietal_lobe, temporal_lobe, WAS2, ada_scid, adipose, right_atrium	ANNOTATED, CDS, coding, INTERNAL, OVCODE, OVERLAPTX, OVEXON, UTR5	Jeck2013, Maass2017, Rybak2015, Salzman2013	-4.19776	0.0544941	0.0112981	0.953548	6.91975	11.1175	108.321	114.467	3499.71	921.973
hsa_circ_0006473	chr4:148867767-148887990:+	ARHGAP10	circBase	413	4	20223	chr4:148861050-148867767|chr4:148887990-148944413	ENSG00000071205.11_2	ENST00000336498.7_1	NM_024605	Hs68_RNase, Hs68_control, Gm12878, Ag04450, Sknshra, diencephalon, cerebellum, WAS2, vena_cava, LCL, HUAEC, plasma, platelets	ANNOTATED, CDS, coding, INTERNAL, OVCODE, OVEXON	Jeck2013, Maass2017, Rybak2015, Salzman2013	-4.15491	0.0561368	0.0412231	0.953548	6.02038	10.1753	108.321	0	1983.17	307.324
hsa_circ_0000219	chr10:15858833-15889942:-	FAM188A	circBase	736	8	31109	chr10:15838171-15858833|chr10:15889942-15902204	ENSG00000148481.13_2	ENST00000477891.1_1	NM_024948	cd_19, Hs68_RNase, Hs68_control, Nhek, K562, Huvec, Helas3, H1hesc, Gm12878, Bj, Ag04450, A549, Sknshra, SY5Y_exp2_D0, diencephalon, Sy5y_exp1_D4, cerebellum, Sy5y_exp1_D0, occipital_lobe, frontal_cortex, Sy5y_exp1_D2, parietal_lobe, temporal_lobe, SY5Y_exp2_D4, EPC, WAS2, ada_scid, cortex, adipose, vena_cava, right_atrium, muscle, LCL, neutophils, platelets	ANNOTATED, CDS, coding, INTERNAL, OVCODE, OVEXON	Jeck2013, Maass2017, Memczak2013, Rybak2015, Salzman2013	-4.13117	0.0570683	0.0415871	0.953548	6.02035	10.1515	108.321	0	1516.54	737.579
hsa_circ_0138872	chr9:5968018-5988545:-	KIAA2026	circBase	1619	2	20527	chr9:5954095-5968018|chr9:5988545-6007194	ENSG00000183354.11_2	ENST00000399933.7_1	NM_001017969	diencephalon, Sy5y_exp1_D4, cerebellum, Sy5y_exp1_D0, occipital_lobe, frontal_cortex, parietal_lobe, SY5Y_exp2_D8, temporal_lobe	ANNOTATED, CDS, coding, INTERNAL, OVCODE, OVEXON	Rybak2015	-3.94931	0.0647349	0.0177487	0.953548	6.93572	10.885	0	228.934	2041.5	1721.02
hsa_circ_0078299	chr6:151669845-151674887:+	AKAP12	circBase	5042	1	5042	chr6:151627038-151669845|chr6:151674887-151676861	ENSG00000131016.16_2	ENST00000402676.6_1	NM_005100	Sknshra, diencephalon, cerebellum, occipital_lobe, frontal_cortex, Sy5y_exp1_D2, parietal_lobe, SY5Y_exp2_D8, temporal_lobe, cortex, adipose	ANNOTATED, CDS, coding, INTERNAL, OVCODE, OVEXON, UTR3	Maass2017, Rybak2015, Salzman2013	-3.93872	0.0652121	0.0178793	0.953548	6.91975	10.8585	108.321	114.467	3383.05	307.324
hsa_circ_0007364	chr1:32381495-32385259:-	PTP4A2	circBase	782	2	3764	None|chr1:32385259-32408129	ENSG00000184007.18_3	ENST00000468531.1_1	NM_080391	Hs68_RNase, Hs68_control, Nhek, K562, Huvec, Hsmm, Hepg2, Helas3, H1hesc, Gm12878, Bj, Ag04450, A549, Nhlf, Sknshra, Mcf7, diencephalon, cerebellum, occipital_lobe, frontal_cortex, parietal_lobe, temporal_lobe	ANNOTATED, CDS, coding, INTERNAL, OVCODE, OVEXON, UTR5	Jeck2013, Rybak2015, Salzman2013	-3.74727	0.074466	0.0154315	0.953548	7.44596	11.1932	324.962	0	3616.37	1044.9
hsa_circ_0001173	chr20:57014000-57016139:+	VAPB	circBase	258	2	2139	chr20:57009761-57014000|chr20:57016139-57019132	ENSG00000124164.15_2	ENST00000475243.5_1	NM_004738	HEK293, cd_19, Hs68_RNase, Hs68_control, Nhek, K562, Huvec, Hepg2, Helas3, H1hesc, Gm12878, Bj, Ag04450, A549, Sknshra, SY5Y_exp2_D0, diencephalon, Sy5y_exp1_D4, cerebellum, Sy5y_exp1_D0, occipital_lobe, frontal_cortex, Sy5y_exp1_D2, parietal_lobe, temporal_lobe, SY5Y_exp2_D4, chondrocytes, WAS2, ada_scid, osteocytes, adipose, decidua, vena_cava, umbilical_cord, muscle, neutophils, platelets, MSC	ANNOTATED, CDS, coding, INTERNAL, OVCODE, OVEXON	Jeck2013, Maass2017, Memczak2013, Rybak2015, Salzman2013	-3.69924	0.0769873	0.0302972	0.953548	6.9035	10.6027	216.642	0	1983.17	1106.37
hsa_circ_0005898	chr10:95140975-95148911:-	MYOF	circBase	420	3	7936	chr10:95139744-95140975|chr10:95148911-95155898	ENSG00000138119.16_2	ENST00000358334.9_1	NM_013451	Hs68_RNase, Hs68_control, Nhek, Hepg2, Helas3, Bj, Ag04450, A549, Mcf7, diencephalon, decidua, HUAEC	ANNOTATED, CDS, coding, INTERNAL, OVCODE, OVEXON	Jeck2013, Maass2017, Rybak2015, Salzman2013	-3.5557	0.085041	0.0407561	0.953548	6.9033	10.459	216.642	0	1749.86	1044.9
hsa_circ_0009043	chr2:72945231-72960247:-	EXOC6B	circBase	390	4	15016	chr2:72802797-72945231|chr2:72960247-72968432	ENSG00000144036.15_2	ENST00000272427.10_1	NM_015189	Hs68_RNase, Hs68_control, Nhek, H1hesc, Gm12878, Ag04450, A549, Nhlf, Sknshra, SY5Y_exp2_D0, diencephalon, Sy5y_exp1_D4, cerebellum, Sy5y_exp1_D0, occipital_lobe, frontal_cortex, Sy5y_exp1_D2, parietal_lobe, SY5Y_exp2_D8, temporal_lobe, SY5Y_exp2_D4, WAS2, ada_scid, cortex, adipose, decidua, vena_cava, right_atrium, umbilical_cord, muscle, neutophils, placenta, platelets	ANNOTATED, CDS, coding, INTERNAL, OVCODE, OVEXON	Jeck2013, Maass2017, Rybak2015, Salzman2013	-3.29657	0.101773	0.0199334	0.953548	8.99363	12.2902	541.604	457.867	4957.92	5040.12
hsa_circ_0001181	chr21:30693541-30702014:+	BACH1	circBase	1836	3	8473	chr21:30671274-30693541|chr21:30702014-30714719	ENSG00000156273.15_4	ENST00000286800.7_1	NM_001186	HEK293, Nhek, K562, Hepg2, Helas3, H1hesc, Gm12878, Bj, Ag04450, A549, Nhlf, Sknshra, SY5Y_exp2_D0, diencephalon, Sy5y_exp1_D4, cerebellum, Sy5y_exp1_D0, occipital_lobe, frontal_cortex, Sy5y_exp1_D2, parietal_lobe, SY5Y_exp2_D8, temporal_lobe, SY5Y_exp2_D4, WAS2, cortex, adipose, decidua, VSMC, vena_cava, right_atrium, LCL, platelets	ANNOTATED, CDS, coding, INTERNAL, UTR5	Maass2017, Memczak2013, Rybak2015, Salzman2013	-3.23506	0.106206	0.0372637	0.953548	7.48566	10.7207	0	343.401	2799.77	553.184
hsa_circ_0001060	chr2:106774513-106782539:-	UXS1	circBase	197	4	8026	chr2:106761826-106774513|chr2:106782539-106810603	ENSG00000115652.14_2	ENST00000283148.11_1	NM_025076	cd_19, diencephalon, temporal_lobe	ANNOTATED, CDS, coding, INTERNAL	Memczak2013, Rybak2015	-3.15563	0.112217	0.0421536	0.953548	7.86075	11.0164	216.642	228.934	3383.05	737.579
hsa_circ_0105829	chr16:69404385-69406258:-	TERF2	circBase	234	2	1873	chr16:69402385-69404385|chr16:69406258-69418482	ENSG00000132604.10_3	ENST00000254942.7_1	ENST00000254942.3	diencephalon, Sy5y_exp1_D4, cerebellum, Sy5y_exp1_D0, occipital_lobe, frontal_cortex, Sy5y_exp1_D2, parietal_lobe, SY5Y_exp2_D8, temporal_lobe	ANNOTATED, CDS, coding, INTERNAL, OVCODE, OVEXON	Rybak2015	-3.123	0.114785	0.0456004	0.953548	7.48581	10.6088	0	343.401	524.957	2581.53
hsa_circ_0003247	chr1:155408117-155429689:-	ASH1L	circBase	844	2	21572	chr1:155385714-155408117|chr1:155429689-155447676	ENSG00000116539.12_3	ENST00000368346.7_1	NM_018489	Hs68_RNase, Hs68_control, Nhek, K562, Hsmm, Hepg2, H1hesc, Gm12878, Bj, Ag04450, Sknshra, diencephalon, Sy5y_exp1_D4, cerebellum, Sy5y_exp1_D0, occipital_lobe, frontal_cortex, Sy5y_exp1_D2, parietal_lobe, temporal_lobe, chondrocytes, WAS2, ada_scid, adipose, vena_cava, LCL, platelets	ANNOTATED, CDS, coding, INTERNAL, OVCODE, OVEXON	Jeck2013, Maass2017, Rybak2015, Salzman2013	-3.07549	0.118628	0.0379689	0.953548	8.16568	11.2412	324.962	228.934	1749.86	3073.24
hsa_circ_0071106	chr4:148778703-148803083:+	ARHGAP10	circBase	650	6	24380	chr4:148768373-148778703|chr4:148803083-148827788	ENSG00000071205.11_2	ENST00000336498.7_1	NM_024605	Gm12878, Bj, Ag04450, Sknshra, SY5Y_exp2_D0, diencephalon, cerebellum, frontal_cortex, SY5Y_exp2_D8, WAS2, ada_scid, cortex, osteocytes, adipose, vena_cava, right_atrium, MSC_047, LCL, platelets	ANNOTATED, CDS, coding, INTERNAL, OVCODE, OVEXON	Maass2017, Rybak2015, Salzman2013	-2.98631	0.126191	0.0315421	0.953548	9.30648	12.2928	108.321	1144.67	8107.66	1905.41
hsa_circ_0007444	chr5:95091099-95099324:+	RHOBTB3	circBase	479	2	8225	chr5:95088054-95091099|chr5:95099324-95103749	ENSG00000164292.12_3	ENST00000379982.7_1	NM_014899	Hs68_RNase, Hs68_control, SY5Y_exp2_D0, diencephalon, Sy5y_exp1_D4, cerebellum, Sy5y_exp1_D0, occipital_lobe, frontal_cortex, Sy5y_exp1_D2, parietal_lobe, SY5Y_exp2_D8, temporal_lobe, SY5Y_exp2_D4, WAS2, ada_scid, osteocytes, adipose, decidua, VSMC, vena_cava, right_atrium, muscle, LCL, HUAEC, placenta, fibroblasts, platelets	ANNOTATED, CDS, coding, INTERNAL, OVCODE, OVEXON	Jeck2013, Maass2017, Rybak2015	-2.83706	0.139946	0.0369642	0.953548	9.51163	12.3487	866.566	572.334	6416.14	3995.22
hsa_circ_0001776	chr7:158552176-158557544:-	ESYT2	circBase	495	5	5368	chr7:158542414-158552176|chr7:158557544-158560344	ENSG00000117868.15_2	ENST00000251527.9_1	NM_020728	cd_19, cd_34, neutr, Hs68_RNase, Hs68_control, Nhek, K562, Huvec, Hepg2, Helas3, Gm12878, Bj, Ag04450, A549, Sknshra, Mcf7, diencephalon, cerebellum, occipital_lobe, frontal_cortex, parietal_lobe, temporal_lobe, EPC, chondrocytes, WAS2, ada_scid, osteocytes, adipose, decidua, VSMC, vena_cava, right_atrium, umbilical_cord, muscle, MSC_047, LCL, HUAEC, placenta, fibroblasts, platelets	ANNOTATED, CDS, coding, INTERNAL, OVCODE, OVEXON	Jeck2013, Maass2017, Memczak2013, Rybak2015, Salzman2013	-2.80942	0.142653	0.0364096	0.953548	10.0765	12.8859	541.604	1602.54	12657.3	2458.6
hsa_circ_0005232	chr2:40655612-40657441:-	SLC8A1	circBase	1829	1	1829	chr2:40405633-40655612|chr2:40657441-40739488	ENSG00000183023.18_3	ENST00000403092.5_1	NM_021097	Hs68_RNase, Hs68_control, diencephalon, Sy5y_exp1_D4, cerebellum, occipital_lobe, frontal_cortex, Sy5y_exp1_D2, parietal_lobe, temporal_lobe, vena_cava, right_atrium	ALT_ACCEPTOR, CDS, coding, INTERNAL, OVCODE, OVEXON, UTR5	Jeck2013, Maass2017, Rybak2015	-2.77865	0.145728	0.0464959	0.953548	9.0261	11.8047	0	1030.2	5657.86	1475.16
