# Supplementary material for: Circular RNA circRGNEF promotes bladder cancer progression via miR-548/KIF2C axis regulation
Source: Aging (Albany NY). 2020 Apr 19;12(8):6865–79. doi: 10.18632/aging.103047 (PMC7202505; doi:10.18632/aging.103047)
Supplement: Supplementary Materials 2 [file aging-12-103047-s001..xlsx]

## Sheet: up_72995_vs_shNC
#log2FC >= 0.585 #p-value cut-off <= 1.00 #q-value cut-off <= 1.00 #Gene biotype: miRNA #Condition pair: up_72995_vs_shNC Column A: Mature_ID, The ID of mature miRNA. Column B: Arm, The arm of miRNA. Column C: Mature_Acc, The accession number of mature miRNA from miRBase. Column D: Mature_Seq, The mature sequence of miRNA. Column E: Seed, The seed sequence of miRNA. Column F: Length, The length o…
Annotation																		DE Statistic				CPM
Mature_ID	Arm	Mature_Acc	Mature_Seq	Seed	Length	High_Confidence	Type	Canonical	Pre_ID	Pre_Acc	Pre_Seq	Pre_Locus	Family_AC	Family_ID	Clustered_miRNAs	Promoter	Primary_microRNA	log2FC	Fold_Change	p_value	q_value	72995_CPM	shNC_CPM	shNC	72995
hsa-miR-642a-5p	5p	MIMAT0003312	GUCCCUCUCCAAAUGUGUCUUG	UCCCUC	22	Yes	Mature_miRNA	canonical_conserved_miRNA	hsa-mir-642a	MI0003657	AUCUGAGUUGGGAGGGUCCCUCUCCAAAUGUGUCUUGGGGUGGGGGAUCAAGACACAUUUGGAGAGGGAACCUCCCAACUCGGCCUCUGCCAUCAUU	chr19:45674928-45675024(+)	MIPF0000468	mir-642	642a,642b	p1@GIPR	NM_000164	5.9225	60.6527	1	1	0.756207	-5.16629	0	1.6612
hsa-miR-4429	5p	MIMAT0018944	AAAAGCUGGGCUGAGAGGCG	AAAGCU	20	NO	-	non-canonical_miRNA	hsa-mir-4429	MI0016768	AGGGAGAAAAGCUGGGCUGAGAGGCGACUGGUGUCUAAUUUGUUUGUCUCUCCAACUCAGACUGCCUGGCCCA	chr2:11540605-11540677(-)	MIPF0001474	mir-4429	4429	Unknown	Unknown	5.56671	47.3966	1	1	0.400417	-5.16629	0	1.29204
hsa-miR-122-5p	5p	MIMAT0000421	UGGAGUGUGACAAUGGUGUUUG	GGAGUG	22	Yes	Mature_miRNA	canonical_conserved_miRNA	hsa-mir-122	MI0000442	CCUUAGCAGAGCUGUGGAGUGUGACAAUGGUGUUUGUGUCUAAACUAUCAAACGCCAUUAUCACACUAAAUAGCUACUGCUAGGC	chr18:58451074-58451158(+)	MIPF0000095	mir-122	122,122b	p@chr18:56113488..56113503,+	curation	5.49935	45.2345	1	1	7.14001	1.64066	3.09024	141.017
hsa-miR-508-3p	3p	MIMAT0002880	UGAUUGUAGCCUUUUGGAGUAGA	GAUUGU	23	Yes	Mature_miRNA	canonical_conserved_miRNA	hsa-mir-508	MI0003195	CCACCUUCAGCUGAGUGUAGUGCCCUACUCCAGAGGGCGUCACUCAUGUAAACUAAAACAUGAUUGUAGCCUUUUGGAGUAGAGUAAUACACAUCACGUAACGCAUAUUUGGUGG	chrX:147236913-147237027(-)	MIPF0000130	mir-506	513a-2,506,507,508	p@chrX:146413659..146413673,-	curation	5.34938	40.7685	1	1	0.183089	-5.16629	0	1.10746
hsa-miR-5699-5p	5p	MIMAT0027103	UGCCCCAACAAGGAAGGACAAG	GCCCCA	22	Yes	-	non-canonical_miRNA	hsa-mir-5699	MI0019306	CUGUACCCCUGCCCCAACAAGGAAGGACAAGAGGUGUGAGCCACACACACGCCUGGCCUCCUGUCUUUCCUUGUUGGAGCAGGGAUGUAG	chr10:641689-641778(-)	-	-	5699	p1@DIP2C	NM_014974	5.34938	40.7685	1	1	0.183089	-5.16629	0	1.10746
hsa-miR-767-3p	3p	MIMAT0003883	UCUGCUCAUACCCCAUGGUUUCU	CUGCUC	23	Yes	-	non-canonical_miRNA	hsa-mir-767	MI0003763	GCUUUUAUAUUGUAGGUUUUUGCUCAUGCACCAUGGUUGUCUGAGCAUGCAGCAUGCUUGUCUGCUCAUACCCCAUGGUUUCUGAGCAGGAACCUUCAUUGUCUACUGC	chrX:152393421-152393529(-)	MIPF0000552	mir-767	105-1,105-2,767	p1@GABRA3	ENST00000370314.4	3.51699	11.4477	1	1	1.82164	-1.69536	0.280931	3.50697
hsa-miR-514a-3p	3p	MIMAT0002883	AUUGACACUUCUGUGAGUAGA	UUGACA	21	Yes	Mature_miRNA	canonical_hsa-specific_miRNA	hsa-mir-514a-1	MI0003198	AACAUGUUGUCUGUGGUACCCUACUCUGGAGAGUGACAAUCAUGUAUAAUUAAAUUUGAUUGACACUUCUGUGAGUAGAGUAACGCAUGACACGUACG	chrX:147279247-147279344(-)	MIPF0000130	mir-506	510,514a-1,514a-2,514a-3	p@chrX:146413659..146413673,-	curation	2.856	7.24005	1	1	2.65615	-0.199851	0.842792	6.27563
hsa-miR-514a-3p	3p	MIMAT0002883	AUUGACACUUCUGUGAGUAGA	UUGACA	21	Yes	Mature_miRNA	canonical_hsa-specific_miRNA	hsa-mir-514a-2	MI0003199	GUUGUCUGUGGUACCCUACUCUGGAGAGUGACAAUCAUGUAUAACUAAAUUUGAUUGACACUUCUGUGAGUAGAGUAACGCAUGACAC	chrX:147281943-147282030(-)	MIPF0000130	mir-506	510,514a-1,514a-2,514a-3	p@chrX:146413659..146413673,-	curation	2.856	7.24005	1	1	2.65615	-0.199851	0.842792	6.27563
hsa-miR-514a-3p	3p	MIMAT0002883	AUUGACACUUCUGUGAGUAGA	UUGACA	21	Yes	Mature_miRNA	canonical_hsa-specific_miRNA	hsa-mir-514a-3	MI0003200	GUUGUCUGUGGUACCCUACUCUGGAGAGUGACAAUCAUGUAUAACUAAAUUUGAUUGACACUUCUGUGAGUAGAGUAACGCAUGACAC	chrX:147284641-147284728(-)	MIPF0000130	mir-506	510,514a-1,514a-2,514a-3	p@chrX:146413659..146413673,-	curation	2.856	7.24005	1	1	2.65615	-0.199851	0.842792	6.27563
hsa-miR-378h	5p	MIMAT0018984	ACUGGACUUGGUGUCAGAUGG	CUGGAC	21	NO	-	non-canonical_miRNA	hsa-mir-378h	MI0016808	ACAGGAACACUGGACUUGGUGUCAGAUGGGAUGAGCCCUGGCUCUGUUUCCUAGCAGCAAUCUGAUCUUGAGCUAGUCACUGG	chr5:154829458-154829540(+)	-	-	378h	Unknown	Unknown	2.73674	6.66561	1	1	1.04138	-1.69536	0.280931	2.03035
hsa-miR-590-5p	5p	MIMAT0003258	GAGCUUAUUCAUAAAAGUGCAG	AGCUUA	22	Yes	Star_miRNA	canonical_conserved_miRNA	hsa-mir-590	MI0003602	UAGCCAGUCAGAAAUGAGCUUAUUCAUAAAAGUGCAGUAUGGUGAAGUCAAUCUGUAAUUUUAUGUAUAAGCUAGUCUCUGAUUGAAACAUGCAGCA	chr7:74191198-74191294(+)	MIPF0000418	mir-590	590	p1@EIF4H	ENST00000353999.6	2.73674	6.66561	1	1	1.04138	-1.69536	0.280931	2.03035
hsa-miR-582-5p	5p	MIMAT0003247	UUACAGUUGUUCAACCAGUUACU	UACAGU	23	Yes	Star_miRNA	canonical_conserved_miRNA	hsa-mir-582	MI0003589	AUCUGUGCUCUUUGAUUACAGUUGUUCAACCAGUUACUAAUCUAACUAAUUGUAACUGGUUGAACAACUGAACCCAAAGGGUGCAAAGUAGAAACAUU	chr5:59703606-59703703(-)	MIPF0000417	mir-582	582	p1@PDE4D	ENST00000507116.1	2.60118	6.06785	1	1	0.905829	-1.69536	0.280931	1.84577
hsa-miR-942-3p	3p	MIMAT0026734	CACAUGGCCGAAACAGAGAAGU	ACAUGG	22	Yes	Star_miRNA	canonical_hsa-specific_miRNA	hsa-mir-942	MI0005767	AUUAGGAGAGUAUCUUCUCUGUUUUGGCCAUGUGUGUACUCACAGCCCCUCACACAUGGCCGAAACAGAGAAGUUACUUUCCUAAU	chr1:117094643-117094728(+)	MIPF0000511	mir-942	942	p1@TTF2	NM_003594	2.45156	5.47008	1	1	0.756207	-1.69536	0.280931	1.6612
hsa-miR-451a	5p	MIMAT0001631	AAACCGUUACCAUUACUGAGUU	AACCGU	22	NO	Mature_miRNA	canonical_conserved_miRNA	hsa-mir-451a	MI0001729	CUUGGGAAUGGCAAGGAAACCGUUACCAUUACUGAGUUUAGUAAUGGUAAUGGUUCUCUUGCUAUACCCAGA	chr17:28861369-28861440(-)	MIPF0000148	mir-451	144,451a,451b,4732	p1@MIR4732	ENST00000582320.2	2.44131	5.43136	1	1	7.39226	4.95095	30.9024	167.965
hsa-miR-486-5p	5p	MIMAT0002177	UCCUGUACUGAGCUGCCCCGAG	CCUGUA	22	Yes	Mature_miRNA	canonical_conserved_miRNA	hsa-mir-486-2	MI0023622	UCCUGUACUGAGCUGCCCCGAGCUGGGCAGCAUGAAGGGCCUCGGGGCAGCUCAGUACAGGAUG	chr8:41660444-41660507(+)	MIPF0000220	mir-486	486-1,486-2	Unknown	Unknown	2.38304	5.21635	1	1	5.3115	2.92846	7.58513	39.6841
hsa-miR-486-5p	5p	MIMAT0002177	UCCUGUACUGAGCUGCCCCGAG	CCUGUA	22	Yes	Mature_miRNA	canonical_conserved_miRNA	hsa-mir-486-1	MI0002470	GCAUCCUGUACUGAGCUGCCCCGAGGCCCUUCAUGCUGCCCAGCUCGGGGCAGCUCAGUACAGGAUAC	chr8:41660441-41660508(-)	MIPF0000220	mir-486	486-1,486-2	p1@ANK1	NM_020477	2.3105	4.96056	1	1	5.29124	2.98074	7.86606	39.1304
hsa-miR-570-3p	3p	MIMAT0003235	CGAAAACAGCAAUUACCUUUGC	GAAAAC	22	Yes	-	non-canonical_miRNA	hsa-mir-570	MI0003577	CUAGAUAAGUUAUUAGGUGGGUGCAAAGGUAAUUGCAGUUUUUCCCAUUAUUUUAAUUGCGAAAACAGCAAUUACCUUUGCACCAACCUGAUGGAGU	chr3:195699401-195699497(+)	MIPF0000317	mir-548	570	p@chr3:195424584..195424631,+	ENST00000451228.1	2.28461	4.87232	1	1	0.589252	-1.69536	0.280931	1.47662
hsa-miR-142-5p	5p	MIMAT0000433	CAUAAAGUAGAAAGCACUACU	AUAAAG	21	Yes	Star_miRNA	canonical_conserved_miRNA	hsa-mir-142	MI0000458	GACAGUGCAGUCACCCAUAAAGUAGAAAGCACUACUAACAGCACUGGAGGGUGUAGUGUUUCCUACUUUAUGGAUGAGUGUACUGUG	chr17:58331232-58331318(-)	MIPF0000084	mir-142	142,4736	p1@AX721088	ENST00000579003.1	2.23144	4.69603	1	1	2.03159	-0.199851	0.842792	4.0607
hsa-miR-203a-3p	3p	MIMAT0000264	GUGAAAUGUUUAGGACCACUAG	UGAAAU	22	Yes	Mature_miRNA	canonical_conserved_miRNA	hsa-mir-203a	MI0000283	GUGUUGGGGACUCGCGCGCUGGGUCCAGUGGUUCUUAACAGUUCAACAGUUCUGUAGCGCAAUUGUGAAAUGUUUAGGACCACUAGACCCGGCGGGCGCGGCGACAGCGA	chr14:104117405-104117514(+)	MIPF0000108	mir-203	203a,203b	p1@MIR203	curation	2.09577	4.27455	1	1	0.400417	-1.69536	0.280931	1.29204
hsa-miR-3173-5p	5p	MIMAT0019214	UGCCCUGCCUGUUUUCUCCUUU	GCCCUG	22	Yes	Mature_miRNA	canonical_conserved_miRNA	hsa-mir-3173	MI0014204	UCCCUGCCCUGCCUGUUUUCUCCUUUGUGAUUUUAUGAGAACAAAGGAGGAAAUAGGCAGGCCAGGGA	chr14:95137919-95137986(-)	MIPF0001383	mir-3173	3173	p1@DICER1	NM_177438	2.09577	4.27455	1	1	0.400417	-1.69536	0.280931	1.29204
hsa-miR-3929	5p	MIMAT0018206	GAGGCUGAUGUGAGUAGACCACU	AGGCUG	23	NO	-	non-canonical_miRNA	hsa-mir-3929	MI0016439	AGUGGCUCACACCAGUAAUCCCAGCACUUUGGGAGGCUGAUGUGAGUAGACCACU	chr18:35934088-35934142(-)	-	-	3929	p@chr18:33530510..33530523,-	curation	2.09577	4.27455	1	1	0.400417	-1.69536	0.280931	1.29204
hsa-miR-7975	5p	MIMAT0031178	AUCCUAGUCACGGCACCA	UCCUAG	18	NO	-	non-canonical_miRNA	hsa-mir-7975	MI0025751	GUGCAAAGAGCAGGAGGACAGGGGAUUUAUCUCCCAAGGGAGGUCCCCUGAUCCUAGUCACGGCACCA	chr19:55123225-55123292(-)	-	-	7975	Unknown	Unknown	2.09577	4.27455	1	1	0.400417	-1.69536	0.280931	1.29204
hsa-miR-144-5p	5p	MIMAT0004600	GGAUAUCAUCAUAUACUGUAAG	GAUAUC	22	Yes	Mature_miRNA	canonical_conserved_miRNA	hsa-mir-144	MI0000460	UGGGGCCCUGGCUGGGAUAUCAUCAUAUACUGUAAGUUUGCGAUGAGACACUACAGUAUAGAUGAUGUACUAGUCCGGGCACCCCC	chr17:28861533-28861618(-)	MIPF0000093	mir-144	144,451a,451b,4732	p1@MIR4732	ENST00000582320.2	1.87844	3.67678	1	1	0.183089	-1.69536	0.280931	1.10746
hsa-miR-320a-5p	5p	MIMAT0037311	GCCUUCUCUUCCCGGUUCUUCC	CCUUCU	22	Yes	-	non-canonical_miRNA	hsa-mir-320a	MI0000542	CUCCCCUCCGCCUUCUCUUCCCGGUUCUUCCCGGAGUCGGGAAAAGCUGGGUUGAGAGGGCGAAAAAGGAUG	chr8:22244966-22245037(-)	MIPF0000163	mir-320	320a	p1@MIR320A	curation	1.87844	3.67678	1	1	0.183089	-1.69536	0.280931	1.10746
hsa-miR-378b	5p	MIMAT0014999	ACUGGACUUGGAGGCAGAA	CUGGAC	19	NO	-	non-canonical_miRNA	hsa-mir-378b	MI0014154	GGUCAUUGAGUCUUCAAGGCUAGUGGAAAGAGCACUGGACUUGGAGGCAGAAAGACC	chr3:10330229-10330285(+)	MIPF0000168	mir-378	378b	Unknown	Unknown	1.87844	3.67678	1	1	0.183089	-1.69536	0.280931	1.10746
hsa-miR-5001-3p	3p	MIMAT0021022	UUCUGCCUCUGUCCAGGUCCUU	UCUGCC	22	Yes	-	non-canonical_miRNA	hsa-mir-5001	MI0017867	AGCUCAGGGCGGCUGCGCAGAGGGCUGGACUCAGCGGCGGAGCUGGCUGCUGGCCUCAGUUCUGCCUCUGUCCAGGUCCUUGUGACCCGCCCGCUCUCCU	chr2:232550474-232550573(-)	-	-	5001	p1@TIGD1	ENST00000408957.3	1.87844	3.67678	1	1	0.183089	-1.69536	0.280931	1.10746
hsa-miR-23c	5p	MIMAT0018000	AUCACAUUGCCAGUGAUUACCC	UCACAU	22	NO	-	non-canonical_miRNA	hsa-mir-23c	MI0016010	AGUGACUUUCCAGGUGUCACACAGUGAGUGGCAUAAUCAGAGUACAAUUUGAGUCAUGCCCAUACAUCACAUUGCCAGUGAUUACCCAAGGAAAGUGACG	chrX:20017088-20017187(-)	MIPF0001429	mir-23c	23c	p1@MAP7D2	ENST00000443379.3	1.80669	3.49838	1	1	2.32522	0.518537	1.40465	4.98359
hsa-miR-183-3p	3p	MIMAT0004560	GUGAAUUACCGAAGGGCCAUAA	UGAAUU	22	Yes	Star_miRNA	canonical_conserved_miRNA	hsa-mir-183	MI0000273	CCGCAGAGUGUGACUCCUGUUCUGUGUAUGGCACUGGUAGAAUUCACUGUGAACAGUCUCAGUCAGUGAAUUACCGAAGGGCCAUAAACAGAGCAGAGACAGAUCCACGA	chr7:129774905-129775014(-)	MIPF0000066	mir-183	96,182,183	p@chr7:129420052..129420074,-	curation	1.66775	3.17719	1	1	0.905829	-0.761924	0.561862	1.84577
hsa-miR-4684-3p	3p	MIMAT0019770	UGUUGCAAGUCGGUGGAGACGU	GUUGCA	22	NO	-	non-canonical_miRNA	hsa-mir-4684	MI0017316	GCACCAGGGGUACCUCUCUACUGACUUGCAACAUACAUUUGUCUUGGUGUGUUGCAAGUCGGUGGAGACGUACCCUUGGUGC	chr1:22719517-22719598(+)	-	-	4684	p1@EPHB2	ENST00000544305.1	1.66775	3.17719	1	1	0.905829	-0.761924	0.561862	1.84577
hsa-miR-9985	5p	MIMAT0039763	UUCACAGUGGCUAAGCUAU	UCACAG	19	NO	-	non-canonical_miRNA	hsa-mir-9985	MI0032313	CCCAUGUUCAUUGAGCUUUAUUCACAGUGGCUAAGCUAUGGAAUCCAUCCAAGUGUUCACUGAUGGAUAAAUGGAUACAGAAAAUGUUUAUAUAUAUAUAUAUAAUAUU	chrY:4606120-4606228(+)	-	-	9985	Unknown	Unknown	1.60048	3.03244	1	1	4.0242	2.42372	5.33769	16.2428
hsa-miR-193a-5p	5p	MIMAT0004614	UGGGUCUUUGCGGGCGAGAUGA	GGGUCU	22	Yes	Mature_miRNA	canonical_conserved_miRNA	hsa-mir-193a	MI0000487	CGAGGAUGGGAGCUGAGGGCUGGGUCUUUGCGGGCGAGAUGAGGGUGUCGGAUCAACUGGCCUACAAAGUCCCAGUUCUCGGCCCCCG	chr17:31559996-31560083(+)	MIPF0000082	mir-193	193a	p@chr17:29886228..29886248,+	curation	1.58497	3.00001	1	1	1.38512	-0.199851	0.842792	2.58408
hsa-miR-10527-5p	5p	MIMAT0041997	AAAGCAAAUGUUGGGUGAACGGC	AAGCAA	23	NO	-	non-canonical_miRNA	hsa-mir-10527	MI0033674	AAAGCAAAUGUUGGGUGAACGGCUGUUUCCUCUUAUUCAAGCCAUGCACCUUACUCUUGCUGGUA	chr12:63823663-63823727(+)	-	-	10527	Unknown	Unknown	1.51813	2.8642	1	1	0.756207	-0.761924	0.561862	1.6612
hsa-miR-191-3p	3p	MIMAT0001618	GCUGCGCUUGGAUUUCGUCCCC	CUGCGC	22	Yes	Star_miRNA	canonical_conserved_miRNA	hsa-mir-191	MI0000465	CGGCUGGACAGCGGGCAACGGAAUCCCAAAAGCAGCUGUUGUCUCCAGAGCAUUCCAGCUGCGCUUGGAUUUCGUCCCCUGCUCUCCUGCCU	chr3:49020618-49020709(-)	MIPF0000194	mir-191	191,425	p2@DALRD3	ENST00000313778.5	1.51813	2.8642	1	1	0.756207	-0.761924	0.561862	1.6612
hsa-miR-548I	5p	MIMAT0014987	AUGGCCAAAACUGCAGUUAUUUU	UGGCCA	23	NO	-	non-canonical_miRNA	hsa-mir-548s	MI0014141	UUGCUGCAAAAAUAAUUGCAGUUUUUGCCAUUAUUUUUAAUAAUUAUAAUAAUGGCCAAAACUGCAGUUAUUUUUGCACCAA	chr2:11767444-11767525(+)	MIPF0000317	mir-548	548s	p1@LPIN1	NM_145693	1.35118	2.5512	1	1	0.589252	-0.761924	0.561862	1.47662
hsa-miR-6130	5p	MIMAT0024614	UGAGGGAGUGGAUUGUAUG	GAGGGA	19	NO	-	non-canonical_miRNA	hsa-mir-6130	MI0021275	CAAUGAAUGUGGAAAUGCAGGCAUCCCUUCUAUAUACUGAUGUAAUUUUCCUUGGAUUUAUAUGCAGUACUGAGGGAGUGGAUUGUAUGGUAGUUCUAUUUUUACAUUU	chr21:23079284-23079392(+)	MIPF0001413	mir-6130	6130	Unknown	Unknown	1.35118	2.5512	1	1	0.589252	-0.761924	0.561862	1.47662
hsa-miR-29b-1-5p	5p	MIMAT0004514	GCUGGUUUCAUAUGGUGGUUUAGA	CUGGUU	24	Yes	Star_miRNA	canonical_conserved_miRNA	hsa-mir-29b-1	MI0000105	CUUCAGGAAGCUGGUUUCAUAUGGUGGUUUAGAUUUAAAUAGUGAUUGUCUAGCACCAUUUGAAAUCAGUGUUCUUGGGGG	chr7:130877459-130877539(-)	MIPF0000009	mir-29	29a,29b-1	p@chr7:130597585..130597624,-	ENST00000432045.2	1.27889	2.42652	1	1	3.54303	2.26414	4.77582	11.6284
hsa-miR-20a-3p	3p	MIMAT0004493	ACUGCAUUAUGAGCACUUAAAG	CUGCAU	22	Yes	Star_miRNA	canonical_conserved_miRNA	hsa-mir-20a	MI0000076	GUAGCACUAAAGUGCUUAUAGUGCAGGUAGUGUUUAGUUAUCUACUGCAUUAUGAGCACUUAAAGUACUGC	chr13:91351065-91351135(+)	MIPF0000001	mir-17	17,18a,19a,19b-1,20a,92a-1	p1@MIR17HG	NR_027349	1.25586	2.3881	1	1	3.52	2.26414	4.77582	11.4438
hsa-miR-548a-3p	3p	MIMAT0003251	CAAAACUGGCAAUUACUUUUGC	AAAACU	22	Yes	-	non-canonical_miRNA	hsa-mir-548a-3	MI0003612	CCUAGAAUGUUAUUAGGUCGGUGCAAAAGUAAUUGCGAGUUUUACCAUUACUUUCAAUGGCAAAACUGGCAAUUACUUUUGCACCAACGUAAUACUU	chr8:104484369-104484465(-)	MIPF0000317	mir-548	548a-3	p1@LRP12	curation	1.2547	2.38617	1	1	2.03159	0.776889	1.68558	4.0607
hsa-miR-381-3p	3p	MIMAT0000736	UAUACAAGGGCAAGCUCUCUGU	AUACAA	22	Yes	Mature_miRNA	canonical_conserved_miRNA	hsa-mir-381	MI0000789	UACUUAAAGCGAGGUUGCCCUUUGUAUAUUCGGUUUAUUGACAUGGAAUAUACAAGGGCAAGCUCUCUGUGAGUA	chr14:101045920-101045994(+)	MIPF0000018	mir-154	134,154,299,376c,369,376a-1,377,379,380,381,382,323a,329-1,329-2,409,412,410,376b,485,487a,494,495,496,539,544a,376a-2,487b,411,654,655,656,758,668,1185-2,1185-1,300,541,889,543,1197,1193,323b	p1@MEG3	Gtl2-Dio3	1.24171	2.36479	1	1	2.42776	1.18605	2.24745	5.35274
hsa-miR-103a-2-5p	5p	MIMAT0009196	AGCUUCUUUACAGUGCUGCCUUG	GCUUCU	23	Yes	Star_miRNA	canonical_conserved_miRNA	hsa-mir-103a-2	MI0000108	UUGUGCUUUCAGCUUCUUUACAGUGCUGCCUUGUAGCAUUCAGGUCAAGCAGCAUUGUACAGGGCUAUGAAAGAACCA	chr20:3917494-3917571(+)	MIPF0000024	mir-103	103a-2,103b-2	p1@PANK2	ENST00000336066.3	1.24123	2.36401	1	1	1.04138	-0.199851	0.842792	2.03035
hsa-miR-619-5p	5p	MIMAT0026622	GCUGGGAUUACAGGCAUGAGCC	CUGGGA	22	NO	-	non-canonical_miRNA	hsa-mir-619	MI0003633	CGCCCACCUCAGCCUCCCAAAAUGCUGGGAUUACAGGCAUGAGCCACUGCGGUCGACCAUGACCUGGACAUGUUUGUGCCCAGUACUGUCAGUUUGCAG	chr12:108836908-108837006(-)	MIPF0000557	mir-619	619	p1@SSH1	NM_018984	1.24123	2.36401	1	1	1.04138	-0.199851	0.842792	2.03035
hsa-miR-3940-3p	3p	MIMAT0018356	CAGCCCGGAUCCCAGCCCACUU	AGCCCG	22	Yes	Mature_miRNA	canonical_hsa-specific_miRNA	hsa-mir-3940	MI0016597	GCUUAUCGAGGAAAAGAUCGAGGUGGGUUGGGGCGGGCUCUGGGGAUUUGGUCUCACAGCCCGGAUCCCAGCCCACUUACCUUGGUUACUCUCCUUCCUUCU	chr19:6416410-6416511(-)	MIPF0001599	mir-3940	3940	p1@KHSRP	NM_003685	1.21891	2.3277	1	1	2.21483	0.995928	1.96652	4.61443
hsa-miR-589-3p	3p	MIMAT0003256	UCAGAACAAAUGCCGGUUCCCAGA	CAGAAC	24	Yes	Star_miRNA	canonical_conserved_miRNA	hsa-mir-589	MI0003599	UCCAGCCUGUGCCCAGCAGCCCCUGAGAACCACGUCUGCUCUGAGCUGGGUACUGCCUGUUCAGAACAAAUGCCGGUUCCCAGACGCUGCCAGCUGGCC	chr7:5495819-5495917(-)	MIPF0000496	mir-589	589	p1@FBXL18	ENST00000382368.3	1.21891	2.3277	1	1	2.21483	0.995928	1.96652	4.61443
hsa-miR-328-3p	3p	MIMAT0000752	CUGGCCCUCUCUGCCCUUCCGU	UGGCCC	22	Yes	Mature_miRNA	canonical_conserved_miRNA	hsa-mir-328	MI0000804	UGGAGUGGGGGGGCAGGAGGGGCUCAGGGAGAAAGUGCAUACAGCCCCUGGCCCUCUCUGCCCUUCCGUCCCCUG	chr16:67202321-67202395(-)	MIPF0000203	mir-328	328	Unknown	Unknown	1.17714	2.26128	1	1	4.20833	3.03119	8.14699	18.4577
hsa-miR-187-3p	3p	MIMAT0000262	UCGUGUCUUGUGUUGCAGCCGG	CGUGUC	22	Yes	Mature_miRNA	canonical_conserved_miRNA	hsa-mir-187	MI0000274	GGUCGGGCUCACCAUGACACAGUGUGAGACCUCGGGCUACAACACAGGACCCGGGCGCUGCUCUGACCCCUCGUGUCUUGUGUUGCAGCCGGAGGGACGCAGGUCCGCA	chr18:35904818-35904926(-)	MIPF0000078	mir-187	187	p@chr18:33530510..33530523,-	curation	1.16234	2.2382	1	1	0.400417	-0.761924	0.561862	1.29204
hsa-miR-6501-5p	5p	MIMAT0025458	AGUUGCCAGGGCUGCCUUUGGU	GUUGCC	22	Yes	-	non-canonical_miRNA	hsa-mir-6501	MI0022213	GGAGUUGCCAGGGCUGCCUUUGGUGACAGCAGCAGUAGAGUUGCCAGAGCAGCCUGCGGUAACAGUA	chr21:33550662-33550728(+)	-	-	6501	p1@SON	ENST00000381679.4	1.16234	2.2382	1	1	0.400417	-0.761924	0.561862	1.29204
hsa-miR-181c-5p	5p	MIMAT0000258	AACAUUCAACCUGUCGGUGAGU	ACAUUC	22	Yes	Mature_miRNA	canonical_conserved_miRNA	hsa-mir-181c	MI0000271	CGGAAAAUUUGCCAAGGGUUUGGGGGAACAUUCAACCUGUCGGUGAGUUUGGGCAGCUCAGGCAAACCAUCGACCGUUGAGUGGACCCUGAGGCCUGGAAUUGCCAUCCU	chr19:13874699-13874808(+)	MIPF0000007	mir-181	181c,181d	p@chr19:13976011..13976059,+	ENST00000591161.1	1.12454	2.18032	1	1	2.88966	1.76512	3.37117	7.38309
hsa-miR-548n	5p	MIMAT0005916	CAAAAGUAAUUGUGGAUUUUGU	AAAAGU	22	NO	-	non-canonical_miRNA	hsa-mir-548n	MI0006399	AGGUUGGUGCAAAAGUAAUUGUGGAUUUUGUCGUUAAAAAUAGCAAAACCCGCAAUUACUUUUGCACCAACCUAA	chr7:34940760-34940834(-)	MIPF0000317	mir-548	548n	p@chr7:35077046..35077137,-	NM_015283	1.11818	2.17073	1	1	1.89507	0.776889	1.68558	3.69155
hsa-miR-4510	5p	MIMAT0019047	UGAGGGAGUAGGAUGUAUGGUU	GAGGGA	22	NO	-	non-canonical_miRNA	hsa-mir-4510	MI0016876	GUGUAUGUGAGGGAGUAGGAUGUAUGGUUGUUAGAUAGACAACUACAAUCUUUUCUCACAACAGACAG	chr15:35926856-35926923(+)	MIPF0001467	mir-4510	4510	Unknown	Unknown	1.10568	2.152	1	1	0.905829	-0.199851	0.842792	1.84577
hsa-miR-550a-3-5p	5p	MIMAT0020925	AGUGCCUGAGGGAGUAAGAG	GUGCCU	20	Yes	Star_miRNA	canonical_hsa-specific_miRNA	hsa-mir-550a-3	MI0003762	GAUGCUUUGCUGGCUGGUGCAGUGCCUGAGGGAGUAAGAGUCCUGUUGUUGUAAGAUAGUGUCUUACUCCCUCAGGCACAUCUCCAACAAGUCUC	chr7:29680734-29680828(-)	MIPF0000334	mir-550	550a-3	p1@LOC646762	NR_024278	1.10568	2.152	1	1	0.905829	-0.199851	0.842792	1.84577
hsa-miR-1298-5p	5p	MIMAT0005800	UUCAUUCGGCUGUCCAGAUGUA	UCAUUC	22	NO	Mature_miRNA	canonical_conserved_miRNA	hsa-mir-1298	MI0003938	AGACGAGGAGUUAAGAGUUCAUUCGGCUGUCCAGAUGUAUCCAAGUACCCUGUGUUAUUUGGCAAUAAAUACAUCUGGGCAACUGACUGAACUUUUCACUUUUCAUGACUCA	chrX:114715233-114715344(+)	MIPF0000598	mir-1298	1298	p1@HTR2C	ENST00000371950.3	1.07578	2.10786	1	1	1.27938	0.203603	1.12372	2.39951
hsa-miR-362-3p	3p	MIMAT0004683	AACACACCUAUUCAAGGAUUCA	ACACAC	22	Yes	Star_miRNA	canonical_conserved_miRNA	hsa-mir-362	MI0000762	CUUGAAUCCUUGGAACCUAGGUGUGAGUGCUAUUUCAGUGCAACACACCUAUUCAAGGAUUCAAA	chrX:50008964-50009028(+)	MIPF0000209	mir-362	188,362,500a,501,502,532,660,500b	p1@CLCN5	ENST00000376091.3	1.04475	2.063	1	1	1.82164	0.776889	1.68558	3.50697
hsa-miR-592	5p	MIMAT0003260	UUGUGUCAAUAUGCGAUGAUGU	UGUGUC	22	NO	Mature_miRNA	canonical_conserved_miRNA	hsa-mir-592	MI0003604	UAUUAUGCCAUGACAUUGUGUCAAUAUGCGAUGAUGUGUUGUGAUGGCACAGCGUCAUCACGUGGUGACGCAACAUCAUGACGUAAGACGUCACAAC	chr7:127058088-127058184(-)	MIPF0000340	mir-592	592	p1@GRM8	ENST00000472701.1	1.03566	2.05005	1	1	2.03159	0.995928	1.96652	4.0607
hsa-miR-4677-3p	3p	MIMAT0019761	UCUGUGAGACCAAAGAACUACU	CUGUGA	22	Yes	Mature_miRNA	canonical_conserved_miRNA	hsa-mir-4677	MI0017308	GCAAAGCAGCAAUUGUUCUUUGGUCUUUCAGCCAUGACCUGACCUUCUGUCUGUGAGACCAAAGAACUACUUUGCUUGGC	chr1:243346176-243346255(+)	MIPF0001848	mir-4677	4677	p1@SDCCAG8	ENST00000366541.3	0.975075	1.96574	1	1	3.32121	2.34613	5.05675	9.96718
hsa-miR-561-5p	5p	MIMAT0022706	AUCAAGGAUCUUAAACUUUGCC	UCAAGG	22	Yes	Mature_miRNA	canonical_hsa-specific_miRNA	hsa-mir-561	MI0003567	CUUCAUCCACCAGUCCUCCAGGAACAUCAAGGAUCUUAAACUUUGCCAGAGCUACAAAGGCAAAGUUUAAGAUCCUUGAAGUUCCUGGGGGAACCAU	chr2:188297492-188297588(+)	MIPF0000623	mir-561	561	p1@GULP1	ENST00000409580.1	0.975075	1.96574	1	1	3.32121	2.34613	5.05675	9.96718
hsa-miR-653-5p	5p	MIMAT0003328	GUGUUGAAACAAUCUCUACUG	UGUUGA	21	Yes	Mature_miRNA	canonical_conserved_miRNA	hsa-mir-653	MI0003674	UUCAUUCCUUCAGUGUUGAAACAAUCUCUACUGAACCAGCUUCAAACAAGUUCACUGGAGUUUGUUUCAAUAUUGCAAGAAUGAUAAGAUGGAAGC	chr7:93482760-93482855(-)	MIPF0000435	mir-653	489,653	p1@CALCR	NM_001742	0.973968	1.96423	1	1	2.95979	1.98582	3.93303	7.75225
hsa-miR-29c-3p	3p	MIMAT0000681	UAGCACCAUUUGAAAUCGGUUA	AGCACC	22	Yes	Mature_miRNA	canonical_conserved_miRNA	hsa-mir-29c	MI0000735	AUCUCUUACACAGGCUGACCGAUUUCUCCUGGUGUUCAGAGUCUGUUUUUGUCUAGCACCAUUUGAAAUCGGUUAUGAUGUAGGGGGA	chr1:207801852-207801939(-)	MIPF0000009	mir-29	29b-2,29c	p1@C1orf132	ENST00000608023.1	0.972701	1.96251	1	1	5.60204	4.62934	24.7219	48.5438
hsa-miR-502-5p	5p	MIMAT0002873	AUCCUUGCUAUCUGGGUGCUA	UCCUUG	21	Yes	Star_miRNA	canonical_conserved_miRNA	hsa-mir-502	MI0003186	UGCUCCCCCUCUCUAAUCCUUGCUAUCUGGGUGCUAGUGCUGGCUCAAUGCAAUGCACCUGGGCAAGGAUUCAGAGAGGGGGAGCU	chrX:50014598-50014683(+)	MIPF0000139	mir-500	188,362,500a,501,502,532,660,500b	p1@CLCN5	ENST00000376091.3	0.970248	1.95918	1	1	2.1563	1.18605	2.24745	4.42986
hsa-miR-548y	5p	MIMAT0018354	AAAAGUAAUCACUGUUUUUGCC	AAAGUA	22	NO	-	non-canonical_miRNA	hsa-mir-548y	MI0016595	GCCUAAACUAUUAGGUUGGUGCAAAAGUAAUCACUGUUUUUGCCAUUACUCUCAGUGGCAAAAACCGUGAUUACUUUUGCACCAACCUAGUAACACCUUCACUGUGGGGG	chr14:47760995-47761104(-)	MIPF0000317	mir-548	548y	p1@LOC100506433	curation	0.967375	1.95528	1	1	1.74426	0.776889	1.68558	3.32239
hsa-miR-7976	5p	MIMAT0031179	UGCCCUGAGACUUUUGCUC	GCCCUG	19	NO	-	non-canonical_miRNA	hsa-mir-7976	MI0025752	UGCCCUGAGACUUUUGCUCUAAUAAUUUAUUCUAAUAAUAAUUUAGAUCAAAAGCCUCAGGGCAGA	chr3:127587111-127587176(-)	-	-	7976	p1@TPRA1	ENST00000393400.2	0.967375	1.95528	1	1	1.74426	0.776889	1.68558	3.32239
hsa-miR-4664-3p	3p	MIMAT0019738	CUUCCGGUCUGUGAGCCCCGUC	UUCCGG	22	Yes	Star_miRNA	canonical_hsa-specific_miRNA	hsa-mir-4664	MI0017294	GUUGGGGGCUGGGGUGCCCACUCCGCAAGUUAUCACUGAGCGACUUCCGGUCUGUGAGCCCCGUCCUCCGC	chr8:143733083-143733153(-)	-	-	4664	p1@FAM83H	ENST00000388913.3	0.945013	1.92521	1	1	0.183089	-0.761924	0.561862	1.10746
hsa-miR-6511b-3p	3p	MIMAT0025848	CCUCACCACCCCUUCUGCCUGCA	CUCACC	23	Yes	-	non-canonical_miRNA	hsa-mir-6511b-1	MI0022552	GGGACGGGGCCUGCAGGCAGAAGUGGGGCUGACAGGGCAGAGGGUUGCGCCCCCUCACCACCCCUUCUGCCUGCAGCGGUGGGCU	chr16:2106669-2106753(-)	MIPF0001382	mir-6511	6511b-1	p2@PKD1	NM_000296	0.945013	1.92521	1	1	0.183089	-0.761924	0.561862	1.10746
hsa-miR-4517	5p	MIMAT0019054	AAAUAUGAUGAAACUCACAGCUGAG	AAUAUG	25	NO	-	non-canonical_miRNA	hsa-mir-4517	MI0016883	AGGUAAAUAUGAUGAAACUCACAGCUGAGGAGCUUAGCAAGUAGCUAAGGCCAGAGCUUGUGUUUGGGUGGUGUGGCUG	chr16:28958583-28958661(+)	-	-	4517	p1@NFATC2IP	ENST00000562977.1	0.89914	1.86495	1	1	1.89507	0.995928	1.96652	3.69155
hsa-miR-141-3p	3p	MIMAT0000432	UAACACUGUCUGGUAAAGAUGG	AACACU	22	Yes	Mature_miRNA	canonical_conserved_miRNA	hsa-mir-141	MI0000457	CGGCCGGCCCUGGGUCCAUCUUCCAGUACAGUGUUGGAUGGUCUAAUUGUGAAGCUCCUAACACUGUCUGGUAAAGAUGGCUCCCGGGUGGGUUC	chr12:6964097-6964191(+)	MIPF0000019	mir-8	141,200c	p1@ENST00000537269	ENST00000607161.1	0.87296	1.83142	1	1	2.37741	1.50445	2.80931	5.16817
hsa-miR-3913-5p	5p	MIMAT0018187	UUUGGGACUGAUCUUGAUGUCU	UUGGGA	22	Yes	-	non-canonical_miRNA	hsa-mir-3913-1	MI0016417	UUGUUUAUAAUAAACUGAAAUAUUUGGGACUGAUCUUGAUGUCUGCCAAAACCUUGGCAGACAUCAAGAUCAGUCCCAAAUAUUUCAGUUUAUUAUAGACAG	chr12:69584722-69584823(-)	MIPF0001134	mir-3913	3913-1,3913-2	Unknown	Unknown	0.86658	1.82334	1	1	1.38512	0.518537	1.40465	2.58408
hsa-miR-3913-5p	5p	MIMAT0018187	UUUGGGACUGAUCUUGAUGUCU	UUGGGA	22	Yes	-	non-canonical_miRNA	hsa-mir-3913-2	MI0016418	UGUCUAUAAUAAACUGAAAUAUUUGGGACUGAUCUUGAUGUCUGCCAAGGUUUUGGCAGACAUCAAGAUCAGUCCCAAAUAUUUCAGUUUAUUAUAAACA	chr12:69584723-69584822(+)	MIPF0001134	mir-3913	3913-1,3913-2	Unknown	Unknown	0.86658	1.82334	1	1	1.38512	0.518537	1.40465	2.58408
hsa-let-7i-3p	3p	MIMAT0004585	CUGCGCAAGCUACUGCCUUGCU	UGCGCA	22	Yes	Star_miRNA	canonical_conserved_miRNA	hsa-let-7i	MI0000434	CUGGCUGAGGUAGUAGUUUGUGCUGUUGGUCGGGUUGUGACAUUGCCCGCUGUGGAGAUAACUGCGCAAGCUACUGCCUUGCUA	chr12:62603686-62603769(+)	MIPF0000002	let-7	let7i	p1@ENST00000550290	ENST00000550290.1	0.861848	1.81736	1	1	4.3192	3.45735	10.9563	19.9344
hsa-miR-146a-5p	5p	MIMAT0000449	UGAGAACUGAAUUCCAUGGGUU	GAGAAC	22	Yes	Mature_miRNA	canonical_conserved_miRNA	hsa-mir-146a	MI0000477	CCGAUGUGUAUCCUCAGCUUUGAGAACUGAAUUCCAUGGGUUGUGUCAGUGUCAGACCUCUGAAAUUCAGUUCUUCAGCUGGGAUAUCUCUGUCAUCGU	chr5:160485352-160485450(+)	MIPF0000103	mir-146	146a	p1@uc003lyl.3	ENST00000517927.1	0.851255	1.80407	1	1	14.0231	13.1719	9228.3	16648.5
hsa-miR-26a-2-3p	3p	MIMAT0004681	CCUAUUCUUGAUUACUUGUUUC	CUAUUC	22	Yes	Star_miRNA	canonical_conserved_miRNA	hsa-mir-26a-2	MI0000750	GGCUGUGGCUGGAUUCAAGUAAUCCAGGAUAGGCUGUUUCCAUCUGUGAGGCCUAUUCUUGAUUACUUGUUUCUGGAGGCAGCU	chr12:57824609-57824692(-)	MIPF0000043	mir-26	26a-2	p1@CTDSP2	ENST00000548823.1	0.84947	1.80184	1	1	3.02667	2.1772	4.49489	8.1214
hsa-miR-363-3p	3p	MIMAT0000707	AAUUGCACGGUAUCCAUCUGUA	AUUGCA	22	Yes	Mature_miRNA	canonical_conserved_miRNA	hsa-mir-363	MI0000764	UGUUGUCGGGUGGAUCACGAUGCAAUUUUGAUGAGUAUCAUAGGAGAAAAAUUGCACGGUAUCCAUCUGUAAACC	chrX:134169378-134169452(-)	MIPF0000138	mir-363	19b-2,92a-2,106a,363,18b,20b	p@chrX:133308067..133308078,-	curation	0.840469	1.79063	1	1	2.92515	2.08468	4.21396	7.56767
hsa-miR-548ay-3p	3p	MIMAT0025453	CAAAACCGCGAUUACUCUUGCA	AAAACC	22	Yes	-	non-canonical_miRNA	hsa-mir-548ay	MI0022210	AGAAGAUGCUUACUACUAGGUUGGUGCAAAAGUAAUUGUGGUUUUUGCAUUUAAAGUAAUGGCCAAAACCGCGAUUACUCUUGCACGAACCUAACGGUAACACUUCU	chr3:32506283-32506389(-)	MIPF0000317	mir-548	548ay	Unknown	Unknown	0.837779	1.7873	1	1	1.04138	0.203603	1.12372	2.03035
hsa-miR-532-3p	3p	MIMAT0004780	CCUCCCACACCCAAGGCUUGCA	CUCCCA	22	Yes	Star_miRNA	canonical_conserved_miRNA	hsa-mir-532	MI0003205	CGACUUGCUUUCUCUCCUCCAUGCCUUGAGUGUAGGACCGUUGGCAUCUUAAUUACCCUCCCACACCCAAGGCUUGCAGAAGAGCGAGCCU	chrX:50003148-50003238(+)	MIPF0000113	mir-188	188,362,500a,501,502,532,660,500b	p1@CLCN5	ENST00000376091.3	0.821579	1.76734	1	1	5.33148	4.5099	22.7554	40.2379
hsa-miR-194-5p	5p	MIMAT0000460	UGUAACAGCAACUCCAUGUGGA	GUAACA	22	Yes	Mature_miRNA	canonical_conserved_miRNA	hsa-mir-194-1	MI0000488	AUGGUGUUAUCAAGUGUAACAGCAACUCCAUGUGGACUGUGUACCAAUUUCCAGUGGAGAUGCUGUUACUUUUGAUGGUUACCAA	chr1:220118157-220118241(-)	MIPF0000055	mir-194	215,194-1	p@chr1:220292448..220292466,-	curation	0.799677	1.74071	1	1	5.65585	4.85618	28.9359	50.3896
hsa-miR-1277-3p	3p	MIMAT0005933	UACGUAGAUAUAUAUGUAUUUU	ACGUAG	22	Yes	Star_miRNA	canonical_conserved_miRNA	hsa-mir-1277	MI0006419	ACCUCCCAAAUAUAUAUAUAUAUGUACGUAUGUGUAUAUAAAUGUAUACGUAGAUAUAUAUGUAUUUUUGGUGGGUUU	chrX:118386394-118386471(+)	MIPF0001937	mir-1277	1277	p1@WDR44	ENST00000371825.3	0.789104	1.728	1	1	0.589252	-0.199851	0.842792	1.47662
hsa-miR-548ab	5p	MIMAT0018928	AAAAGUAAUUGUGGAUUUUGCU	AAAGUA	22	NO	-	non-canonical_miRNA	hsa-mir-548ab	MI0016752	AUGUUGGUGCAAAAGUAAUUGUGGAUUUUGCUAUUACUUGUAUUUAUUUGUAAUGCAAAACCCGCAAUUAGUUUUGCACCAACC	chr3:103524033-103524116(-)	MIPF0000317	mir-548	548ab	Unknown	Unknown	0.789104	1.728	1	1	0.589252	-0.199851	0.842792	1.47662
hsa-miR-590-3p	3p	MIMAT0004801	UAAUUUUAUGUAUAAGCUAGU	AAUUUU	21	Yes	Mature_miRNA	canonical_conserved_miRNA	hsa-mir-590	MI0003602	UAGCCAGUCAGAAAUGAGCUUAUUCAUAAAAGUGCAGUAUGGUGAAGUCAAUCUGUAAUUUUAUGUAUAAGCUAGUCUCUGAUUGAAACAUGCAGCA	chr7:74191198-74191294(+)	MIPF0000418	mir-590	590	p1@EIF4H	ENST00000353999.6	0.780651	1.71791	1	1	6.23526	5.45461	43.8252	75.3076
hsa-miR-133a-3p	3p	MIMAT0000427	UUUGGUCCCCUUCAACCAGCUG	UUGGUC	22	Yes	Mature_miRNA	canonical_conserved_miRNA	hsa-mir-133a-1	MI0000450	ACAAUGCUUUGCUAGAGCUGGUAAAAUGGAACCAAAUCGCCUCUUCAAUGGAUUUGGUCCCCUUCAACCAGCUGUAGCUAUGCAUUGA	chr18:21825698-21825785(-)	MIPF0000029	mir-133	1-2,133a-1	p1@uc002ktr.2,p1@uc002kts.2	ENST00000581072.1	0.77889	1.71581	1	1	1.96494	1.18605	2.24745	3.87612
hsa-miR-133a-3p	3p	MIMAT0000427	UUUGGUCCCCUUCAACCAGCUG	UUGGUC	22	Yes	Mature_miRNA	canonical_conserved_miRNA	hsa-mir-133a-2	MI0000451	GGGAGCCAAAUGCUUUGCUAGAGCUGGUAAAAUGGAACCAAAUCGACUGUCCAAUGGAUUUGGUCCCCUUCAACCAGCUGUAGCUGUGCAUUGAUGGCGCCG	chr20:62564912-62565013(+)	MIPF0000029	mir-133	133a-2	p1@C20orf166	NM_178463	0.77889	1.71581	1	1	1.96494	1.18605	2.24745	3.87612
hsa-miR-181a-5p	5p	MIMAT0000256	AACAUUCAACGCUGUCGGUGAGU	ACAUUC	23	Yes	Mature_miRNA	canonical_conserved_miRNA	hsa-mir-181a-1	MI0000289	UGAGUUUUGAGGUUGCUUCAGUGAACAUUCAACGCUGUCGGUGAGUUUGGAAUUAAAAUCAAAACCAUCGACCGUUGAUUGUACCCUAUGGCUAACCAUCAUCUACUCCA	chr1:198859044-198859153(-)	MIPF0000007	mir-181	181b-1,181a-1	p1@LOC100131234	NR_040073	0.777051	1.71362	1	1	9.45224	8.67519	408.754	700.471
hsa-miR-181a-5p	5p	MIMAT0000256	AACAUUCAACGCUGUCGGUGAGU	ACAUUC	23	Yes	Mature_miRNA	canonical_conserved_miRNA	hsa-mir-181a-2	MI0000269	AGAAGGGCUAUCAGGCCAGCCUUCAGAGGACUCCAAGGAACAUUCAACGCUGUCGGUGAGUUUGGGAUUUGAAAAAACCACUGACCGUUGACUGUACCUUGGGGUCCUUA	chr9:124692442-124692551(+)	MIPF0000007	mir-181	181a-2,181b-2	p1@MIR181A2HG	NR_038975	0.774158	1.71019	1	1	9.45034	8.67618	409.035	699.548
hsa-miR-497-5p	5p	MIMAT0002820	CAGCAGCACACUGUGGUUUGU	AGCAGC	21	Yes	Mature_miRNA	canonical_conserved_miRNA	hsa-mir-497	MI0003138	CCACCCCGGUCCUGCUCCCGCCCCAGCAGCACACUGUGGUUUGUACGGCACUGUGGCCACGUCCAAACCACACUGUGGUGUUAGAGCGAGGGUGGGGGAGGCACCGCCGAGG	chr17:7017911-7018022(-)	MIPF0000231	mir-497	195,497	p1@MIR497HG	ENST00000572453.1	0.769569	1.70476	1	1	3.26692	2.49735	5.61862	9.59802
hsa-miR-1269a	5p	MIMAT0005923	CUGGACUGAGCCGUGCUACUGG	UGGACU	22	NO	Mature_miRNA	canonical_hsa-specific_miRNA	hsa-mir-1269a	MI0006406	UGGAUUGCCUAGACCAGGGAAGCCAGUUGGCAUGGCUCAGUCCAAGUCUGACCACCUGAGGAAUGCCUGGACUGAGCCGUGCUACUGGCUUCCCUGGUCUCCAGC	chr4:66276824-66276928(+)	MIPF0000984	mir-1269	1269a	p1@ENST00000443143	curation	0.760847	1.69449	1	1	1.27938	0.518537	1.40465	2.39951
hsa-miR-301b-3p	3p	MIMAT0004958	CAGUGCAAUGAUAUUGUCAAAGC	AGUGCA	23	Yes	Mature_miRNA	canonical_conserved_miRNA	hsa-mir-301b	MI0005568	GCCGCAGGUGCUCUGACGAGGUUGCACUACUGUGCUCUGAGAAGCAGUGCAAUGAUAUUGUCAAAGCAUCUGGGACCA	chr22:21652981-21653058(+)	MIPF0000034	mir-130	130b,301b	p3@PPIL2	ENST00000498589.1	0.760847	1.69449	1	1	1.27938	0.518537	1.40465	2.39951
hsa-miR-222-5p	5p	MIMAT0004569	CUCAGUAGCCAGUGUAGAUCCU	UCAGUA	22	Yes	Star_miRNA	canonical_conserved_miRNA	hsa-mir-222	MI0000299	GCUGCUGGAAGGUGUAGGUACCCUCAAUGGCUCAGUAGCCAGUGUAGAUCCUGUCUUUCGUAAUCAGCAGCUACAUCUGGCUACUGGGUCUCUGAUGGCAUCUUCUAGCU	chrX:45747015-45747124(-)	MIPF0000051	mir-221	221,222	p@chrX:45629661..45629677,-	ENST00000602461.1	0.750978	1.68293	1	1	4.20833	3.45735	10.9563	18.4577
hsa-miR-194-5p	5p	MIMAT0000460	UGUAACAGCAACUCCAUGUGGA	GUAACA	22	Yes	Mature_miRNA	canonical_conserved_miRNA	hsa-mir-194-2	MI0000732	UGGUUCCCGCCCCCUGUAACAGCAACUCCAUGUGGAAGUGCCCACUGGUUCCAGUGGGGCUGCUGUUAUCUGGGGCGAGGGCCAG	chr11:64891355-64891439(-)	MIPF0000055	mir-194	192,194-2,6749,6750	p1@ENST00000413053,p1@uc009ypx.2	ENST00000413053.1	0.728759	1.65721	1	1	5.92051	5.19175	36.521	60.5414
hsa-miR-26b-3p	3p	MIMAT0004500	CCUGUUCUCCAUUACUUGGCU	CUGUUC	21	Yes	Star_miRNA	canonical_conserved_miRNA	hsa-mir-26b	MI0000084	CCGGGACCCAGUUCAAGUAAUUCAGGAUAGGUUGUGUGCUGUCCAGCCUGUUCUCCAUUACUUGGCUCGGGGACCGG	chr2:218402646-218402722(+)	MIPF0000043	mir-26	26b	p1@CTDSP1	NM_021198	0.709015	1.63469	1	1	1.89507	1.18605	2.24745	3.69155
hsa-miR-181b-5p	5p	MIMAT0000257	AACAUUCAUUGCUGUCGGUGGGU	ACAUUC	23	Yes	Mature_miRNA	canonical_conserved_miRNA	hsa-mir-181b-1	MI0000270	CCUGUGCAGAGAUUAUUUUUUAAAAGGUCACAAUCAACAUUCAUUGCUGUCGGUGGGUUGAACUGUGUGGACAAGCUCACUGAACAAUGAAUGCAACUGUGGCCCCGCUU	chr1:198858873-198858982(-)	MIPF0000007	mir-181	181b-1,181a-1	p1@LOC100131234	NR_040073	0.70273	1.62758	1	1	7.73241	7.02968	130.633	212.633
hsa-miR-29b-2-5p	5p	MIMAT0004515	CUGGUUUCACAUGGUGGCUUAG	UGGUUU	22	Yes	Star_miRNA	canonical_conserved_miRNA	hsa-mir-29b-2	MI0000107	CUUCUGGAAGCUGGUUUCACAUGGUGGCUUAGAUUUUUCCAUCUUUGUAUCUAGCACCAUUUGAAAUCAGUGUUUUAGGAG	chr1:207802443-207802523(-)	MIPF0000009	mir-29	29b-2,29c	p1@C1orf132	ENST00000608023.1	0.702226	1.62701	1	1	0.905829	0.203603	1.12372	1.84577
hsa-miR-3176	5p	MIMAT0015053	ACUGGCCUGGGACUACCGG	CUGGCC	19	NO	-	non-canonical_miRNA	hsa-mir-3176	MI0014210	UGGCCUCUCCAGUCUGCAGCUCCCGGCAGCCUCGGGCCACACUCCCGGGAUCCCCAGGGACUGGCCUGGGACUACCGGGGGUGGCGGCCG	chr16:543277-543366(+)	-	-	3176,5587	p1@SOLH	ENST00000562370.1	0.702226	1.62701	1	1	0.905829	0.203603	1.12372	1.84577
hsa-miR-205-5p	5p	MIMAT0000266	UCCUUCAUUCCACCGGAGUCUG	CCUUCA	22	Yes	Mature_miRNA	canonical_conserved_miRNA	hsa-mir-205	MI0000285	AAAGAUCCUCAGACAAUCCAUGUGCUUCUCUUGUCCUUCAUUCCACCGGAGUCUGUCUCAUACCCAACCAGAUUUCAGUGGAGUGAAGUUCAGGAGGCAUGGAGCUGACA	chr1:209432133-209432242(+)	MIPF0000058	mir-205	205	p1@MIR205HG	ENST00000429156.1	0.695651	1.61961	1	1	2.95979	2.26414	4.77582	7.75225
hsa-miR-320d	5p	MIMAT0006764	AAAAGCUGGGUUGAGAGGA	AAAGCU	19	NO	-	non-canonical_miRNA	hsa-mir-320d-2	MI0008192	UAUCAAUAAGCCUUCUCUUCCCAGUUCUUCUUGGAGUCAGGAAAAGCUGGGUUGAGAGGAGCAGAAAAGAAA	chrX:140926160-140926231(-)	MIPF0000163	mir-320	320d-2	Unknown	Unknown	0.680533	1.60273	1	1	3.02667	2.34613	5.05675	8.1214
hsa-miR-1306-5p	5p	MIMAT0022726	CCACCUCCCCUGCAAACGUCCA	CACCUC	22	Yes	-	non-canonical_miRNA	hsa-mir-1306	MI0006443	GUGAGCAGUCUCCACCACCUCCCCUGCAAACGUCCAGUGGUGCAGAGGUAAUGGACGUUGGCUCUGGUGGUGAUGGACAGUCCGA	chr22:20086058-20086142(+)	MIPF0000531	mir-1306	1306,3618	p1@DGCR8	NM_022720	0.677574	1.59945	1	1	2.03159	1.35401	2.52838	4.0607
hsa-miR-19b-3p	3p	MIMAT0000074	UGUGCAAAUCCAUGCAAAACUGA	GUGCAA	23	Yes	Mature_miRNA	canonical_conserved_miRNA	hsa-mir-19b-2	MI0000075	ACAUUGCUACUUACAAUUAGUUUUGCAGGUUUGCAUUUCAGCGUAUAUAUGUAUAUGUGGCUGUGCAAAUCCAUGCAAAACUGAUUGUGAUAAUGU	chrX:134169671-134169766(-)	MIPF0000011	mir-19	19b-2,92a-2,106a,363,18b,20b	p@chrX:133308067..133308078,-	curation	0.672213	1.59352	1	1	8.68458	8.01236	258.175	411.423
hsa-miR-19b-3p	3p	MIMAT0000074	UGUGCAAAUCCAUGCAAAACUGA	GUGCAA	23	Yes	Mature_miRNA	canonical_conserved_miRNA	hsa-mir-19b-1	MI0000074	CACUGUUCUAUGGUUAGUUUUGCAGGUUUGCAUCCAGCUGUGUGAUAUUCUGCUGUGCAAAUCCAUGCAAAACUGACUGUGGUAGUG	chr13:91351192-91351278(+)	MIPF0000011	mir-19	17,18a,19a,19b-1,20a,92a-1	p1@MIR17HG	NR_027349	0.665805	1.58645	1	1	8.64322	7.97741	251.995	399.795
hsa-miR-4448	5p	MIMAT0018967	GGCUCCUUGGUCUAGGGGUA	GCUCCU	20	NO	-	non-canonical_miRNA	hsa-mir-4448	MI0016791	AGGAGUGACCAAAAGACAAGAGUGCGAGCCUUCUAUUAUGCCCAGACAGGGCCACCAGAGGGCUCCUUGGUCUAGGGGUAAUGCCA	chr3:183886800-183886885(+)	-	-	4448	p1@ENST00000445165	ENST00000445165.1	0.662647	1.58298	1	1	2.42776	1.76512	3.37117	5.35274
hsa-miR-181b-5p	5p	MIMAT0000257	AACAUUCAUUGCUGUCGGUGGGU	ACAUUC	23	Yes	Mature_miRNA	canonical_conserved_miRNA	hsa-mir-181b-2	MI0000683	CUGAUGGCUGCACUCAACAUUCAUUGCUGUCGGUGGGUUUGAGUCUGAAUCAACUCACUGAUCAAUGAAUGCAAACUGCGGACCAAACA	chr9:124693710-124693798(+)	MIPF0000007	mir-181	181a-2,181b-2	p1@MIR181A2HG	NR_038975	0.656951	1.57675	1	1	7.94184	7.28489	155.917	245.857
hsa-miR-215-5p	5p	MIMAT0000272	AUGACCUAUGAAUUGACAGAC	UGACCU	21	Yes	Mature_miRNA	canonical_conserved_miRNA	hsa-mir-215	MI0000291	AUCAUUCAGAAAUGGUAUACAGGAAAAUGACCUAUGAAUUGACAGACAAUAUAGCUGAGUUUGUCUGUCAUUUCUUUAGGCCAAUAUUCUGUAUGACUGUGCUACUUCAA	chr1:220117853-220117962(-)	MIPF0000063	mir-192	215,194-1	p@chr1:220292448..220292466,-	curation	0.639805	1.55812	1	1	3.399	2.7592	6.74234	10.5209
hsa-miR-137-5p	5p	MIMAT0037310	ACGGGUAUUCUUGGGUGGAUAAU	CGGGUA	23	Yes	Star_miRNA	canonical_conserved_miRNA	hsa-mir-137	MI0000454	GGUCCUCUGACUCUCUUCGGUGACGGGUAUUCUUGGGUGGAUAAUACGGAUUACGUUGUUAUUGCUUAAGAAUACGCGUAGUCGAGGAGAGUACCAGCGGCA	chr1:98046070-98046171(-)	MIPF0000106	mir-137	137,2682	p1@MIR137HG	NR_046105.1	0.600268	1.516	1	1	0.400417	-0.199851	0.842792	1.29204
hsa-miR-144-3p	3p	MIMAT0000436	UACAGUAUAGAUGAUGUACU	ACAGUA	20	Yes	Mature_miRNA	canonical_conserved_miRNA	hsa-mir-144	MI0000460	UGGGGCCCUGGCUGGGAUAUCAUCAUAUACUGUAAGUUUGCGAUGAGACACUACAGUAUAGAUGAUGUACUAGUCCGGGCACCCCC	chr17:28861533-28861618(-)	MIPF0000093	mir-144	144,451a,451b,4732	p1@MIR4732	ENST00000582320.2	0.600268	1.516	1	1	0.400417	-0.199851	0.842792	1.29204
hsa-miR-2110	5p	MIMAT0010133	UUGGGGAAACGGCCGCUGAGUG	UGGGGA	22	NO	-	non-canonical_miRNA	hsa-mir-2110	MI0010629	CAGGGGUUUGGGGAAACGGCCGCUGAGUGAGGCGUCGGCUGUGUUUCUCACCGCGGUCUUUUCCUCCCACUCUUG	chr10:114174105-114174179(-)	MIPF0001399	mir-2110	2110	p1@C10orf118	ENST00000369285.3	0.600268	1.516	1	1	0.400417	-0.199851	0.842792	1.29204
hsa-miR-5582-3p	3p	MIMAT0022280	UAAAACUUUAAGUGUGCCUAGG	AAAACU	22	Yes	-	non-canonical_miRNA	hsa-mir-5582	MI0019138	UAGGCACACUUAAAGUUAUAGCUACAUCAGUUAUAACUAUAUCAGUUAAAACUUUAAGUGUGCCUAGG	chr11:46753125-46753192(-)	-	-	5582	p1@CKAP5	ENST00000415402.1	0.600268	1.516	1	1	0.400417	-0.199851	0.842792	1.29204
hsa-miR-627-3p	3p	MIMAT0026623	UCUUUUCUUUGAGACUCACU	CUUUUC	20	Yes	-	non-canonical_miRNA	hsa-mir-627	MI0003641	UACUUAUUACUGGUAGUGAGUCUCUAAGAAAAGAGGAGGUGGUUGUUUUCCUCCUCUUUUCUUUGAGACUCACUACCAAUAAUAAGAAAUACUACUA	chr15:42199570-42199666(-)	MIPF0000550	mir-627	627	p1@VPS39	NM_015289	0.600268	1.516	1	1	0.400417	-0.199851	0.842792	1.29204
